# Supplementary material for: Long-term outcomes for neoadjuvant versus adjuvant chemotherapy in early breast cancer: meta-analysis of individual patient data from ten randomised trials
Source: PubMed Central journal article supplement (PMC5757427; doi:10.1016/s1470-2045(17)30777-5), 2018-01
Supplement: mmc1.pdf [file mmc1.pdf]

# THE LANCET Oncology

## Supplementary appendix

This appendix formed part of the original submission and has been peer reviewed. We post it as supplied by the authors.

Supplement to: Early Breast Cancer Trialists' Collaborative Group (EBCTCG). Long-term outcomes for neoadjuvant versus adjuvant chemotherapy in early breast cancer: meta-analysis of individual patient data from ten randomised trials. *Lancet Oncol* 2017; published online Dec 11. [http://dx.doi.org/10.1016/S1470-2045\(17\)30777-5](http://dx.doi.org/10.1016/S1470-2045(17)30777-5).

## Contents list of appendix to: Neo-adjuvant versus adjuvant chemotherapy in early breast cancer: patient-level meta-analysis of long-term outcomes among 4756 women in 10 randomised trials

**CONTROL+CLICK on any page number to jump to it**

|                                                                     | Page                                                                                                                                                                    |
|---------------------------------------------------------------------|-------------------------------------------------------------------------------------------------------------------------------------------------------------------------|
| <b>Materials</b>                                                    |                                                                                                                                                                         |
| Webtable 1                                                          | Trial eligibility criteria, radiotherapy and surgery details. <a href="#">2</a>                                                                                         |
| Webtable 2                                                          | Trial systemic treatments and sequencing with surgery by allocated treatment <a href="#">3</a>                                                                          |
| Webtable 3                                                          | Definitions of tumour response and tumour response assessment within trial <a href="#">5</a>                                                                            |
| Webtable 4                                                          | Data items available by trial <a href="#">6</a>                                                                                                                         |
| <b>Mortality</b>                                                    |                                                                                                                                                                         |
| Webfigure 1                                                         | Mortality by trial <a href="#">7</a>                                                                                                                                    |
| <b>Tumour response</b>                                              |                                                                                                                                                                         |
| Webtable 5                                                          | Breast tumour clinical response <a href="#">8</a>                                                                                                                       |
| <b>Extent of local therapy</b>                                      |                                                                                                                                                                         |
| Webtable 6                                                          | Planned versus actual surgery by trial and allocated treatment <a href="#">9</a>                                                                                        |
| Webfigure 2                                                         | Planned versus actual surgery given by allocated treatment <a href="#">10</a>                                                                                           |
| <b>Recurrence and extent of local therapy</b>                       |                                                                                                                                                                         |
| Webtable 7                                                          | Local recurrence in women randomised to neo-adjuvant chemotherapy by their sequence of planned and actual local therapy <a href="#">11</a>                              |
| Webfigure 3                                                         | Local recurrence by extent of planned local therapy and trial <a href="#">12</a>                                                                                        |
| <b>Recurrence and mortality by various factors</b>                  |                                                                                                                                                                         |
| Webfigure 4                                                         | Effect of neo-adjuvant chemotherapy on recurrence and breast cancer mortality by various factors <a href="#">13</a>                                                     |
| <b>Recurrence and mortality by various factors</b>                  |                                                                                                                                                                         |
| Webfigure 5                                                         | Recurrence and mortality by clinical response <a href="#">14</a>                                                                                                        |
| <b>Tumour response, recurrence and mortality</b>                    |                                                                                                                                                                         |
| Webfigure 6                                                         | Percentage of tumour complete clinical response by trial and breast-conserving surgery rates <a href="#">15</a>                                                         |
| Webfigure 7                                                         | Recurrence and breast cancer mortality by trial and by percentage of women with breast tumour complete clinical response and breast-conserving rate. <a href="#">16</a> |
| <b>Trials not available for analysis</b>                            |                                                                                                                                                                         |
| Webtable 8                                                          | Details of trials not available for analysis. <a href="#">17</a>                                                                                                        |
| <b>Sensitivity analyses</b>                                         |                                                                                                                                                                         |
| Webtable 9                                                          | Sensitivity analyses of using different methods to assess the affect of neo-adjuvant chemotherapy on local and distant recurrence. <a href="#">18</a>                   |
| <b>EBCTCG collaborators, alphabetically by institution and name</b> |                                                                                                                                                                         |
| Webfigure 8                                                         | Collaborators <a href="#">19</a>                                                                                                                                        |

**Webtable 1: Trial eligibility criteria, recruitment period, radiotherapy and surgery details**

| <b>Trial, entry years</b>  | <b>Eligibility</b>               | <b>Radiotherapy (RT) sites: breast, chest wall, axilla, SCF, IMC</b>                                                                                                                                                | <b>Type of surgery (RM, MRM, M, Lx=BCS, AD)</b>                                                                                                                                                                      |
|----------------------------|----------------------------------|---------------------------------------------------------------------------------------------------------------------------------------------------------------------------------------------------------------------|----------------------------------------------------------------------------------------------------------------------------------------------------------------------------------------------------------------------|
| BCCA Vancouver (83-90)     | Stages I and II, high risk only  | Publication of pilot study indicates N+ women with inner or central quadrant tumours received RT, but no details of areas irradiated                                                                                | Neoadjuvant – 66% had MRM, 31% Lx, 3% unknown<br>Adjuvant – 67% had MRM, 30% Lx, 3% unknown                                                                                                                          |
| IB Bordeaux (85-90)        | Tumour T2-3, N0-1, M0            | Neoadjuvant – B+nodes, IMC & SCF (CR), B (PR), and no RT if SD/PD (had M)<br>Adjuvant – no RT                                                                                                                       | Neoadjuvant – 37% MRM (SD/PD) , 30% Lx (PR), 33% None (CR)<br>Adjuvant – 100% MRM                                                                                                                                    |
| Institut Curie S6 (86-90)  | Tumour 3-7cm, N0-1, M0           | Neoadjuvant – RT (pre-surgery) to B + boost if responded to RT<br>Adjuvant – RT (pre-surgery) to B + boost if responded to RT<br>All women 54 Gy to axilla + 10-15 Gy boost if N1 (if no surgery), 45 Gy to SCF/IMC | Neoadjuvant – 18% MRM±RT, 31% Lx+RT, 51% none<br>Adjuvant – 23% MRM±RT, 32% Lx+RT, 46% none<br>Surgery determined by tumour mass at time of surgery.                                                                 |
| NSABP B-18 (88-93)         | T1-3, N0-1                       | Neoadjuvant – RT to B after Lx, none after RM<br>Adjuvant – RT to B after Lx, none after RM                                                                                                                         | Neoadjuvant – 22% RM, 68% Lx+AD<br>Adjuvant – 40% RM, 60% Lx+AD<br>Lx likely if T ≤ 5cm and NO                                                                                                                       |
| St George's London (90-93) | Age 30-69, M0                    | T<5cm RT to B+boost and RT to axilla & SCF if N+. RT to IMC if medial tumour.<br>T>5cm, no surgery RT to B+optional boost to tumour site; RT to axilla & SCF if N+.                                                 | Neoadjuvant – 15% M, 66% Lx+AD1, 19% none<br>Adjuvant – 12% M, 84% Lx+AD1 , 4% none<br>M if T>5cm and no response to RT, Lx+RT if T<5cm, no surgery if T>5cm and response to RT                                      |
| RMH London (90-95)         | Age <70, operable                | Neoadjuvant – RT to B +boost and RT to axilla & SCF if N+ after Lx, none after M<br>Adjuvant – RT to B + boost and RT to axilla & SCF if N+ after Lx, none after M                                                  | Neoadjuvant – 11% M, 88% Lx, 1% none<br>Adjuvant – 22% M, 77% Lx, 1% none<br>Both arms: surgery appropriate to the size and position of tumour and palpable axillary lymph nodes excised by lower axillary sampling. |
| NCI Bethesda (90-98)       | T2N0-1 , T1N1                    | Neoadjuvant – RT to B+boost and RT to SCF in N+ after Lx, none after MRM<br>Adjuvant – RT to B+boost and RT to SCF if N+ after Lx, none after MRM                                                                   | Neoadjuvant – 58% MRM, 42% Lx+AD<br>Adjuvant – 59% MRM, 41% Lx+AD                                                                                                                                                    |
| Austrian BCSG VII (91-99)  | T1-3, N0-1, M0                   | Neoadjuvant – RT (targets unspecified) after Lx, RT discretionary after MRM<br>Adjuvant – RT (targets unspecified) after Lx, RT discretionary after MRM                                                             | Neoadjuvant – 34% MRM, 66% Lx+AD<br>Adjuvant – 40% MRM, 60% Lx+AD                                                                                                                                                    |
| EORTC 10902 (91-99)        | T1c/2/3/4b, N0-1                 | Neoadjuvant – RT to B after Lx, RT to CW+IMC if T>5cm, +SCF if N+ after MRM<br>Adjuvant – RT to B after Lx, RT to CW+IMC if T>5cm, +SCF if N+ after MRM<br>RT in all cases if surgery not considered radical        | Neoadjuvant – 58% MRM, 34% Lx+AD, 8% none<br>Adjuvant – 75% MRM, 23% Lx+AD , 2% none<br>Surgery determined by tumour mass at time of surgery.                                                                        |
| ECTO Italy (96-02)         | Operable breast cancer size >2cm | Neoadjuvant – RT to B+boost, RT after M if T4 disease<br>Adjuvant – RT to B+boost, RT after M if T4 disease.<br>Institutional variation accepted                                                                    | Neoadjuvant – 33% MRM, 65% Lx+AD3, 2% none<br>Adjuvant – 66% MRM, 34% Lx+AD3, 0% none<br>Surgery determined by tumour mass at time of surgery.                                                                       |

ADn=axillary dissection (if given, n=level), B=breast CW=chest wall, CR=complete response, IMC=internal mammary chain, Lx=lumpectomy, M=mastectomy (details unspecified), MRM=modified radical mastectomy, PR=partial response, RM=radical mastectomy, RT=radiotherapy, SCF=supraclavicular fossa, SD/PD=stable/progressive disease.

**Webtable 2: Trial systemic treatments and sequencing with surgery, by allocated treatment (N=Neo-adjuvant, A = Adjuvant only)**

| Trial              | Arm | Treatment details                                                                                                                                                                                                                                                                                                                                                                                                                                                                                                                                                                |
|--------------------|-----|----------------------------------------------------------------------------------------------------------------------------------------------------------------------------------------------------------------------------------------------------------------------------------------------------------------------------------------------------------------------------------------------------------------------------------------------------------------------------------------------------------------------------------------------------------------------------------|
| BCCA Vancouver     | N   | (Cyclophosphamide [600 mg/m <sup>2</sup> iv] + Methotrexate [40 mg/m <sup>2</sup> iv] + 5-Fluorouracil [600 mg/m <sup>2</sup> iv]) × 1 pre-op + (Cyclophosphamide [600 mg/m <sup>2</sup> iv] + Methotrexate [40 mg/m <sup>2</sup> iv] + 5-Fluorouracil [600 mg/m <sup>2</sup> iv]) q3wk × 8 postop                                                                                                                                                                                                                                                                               |
|                    | A   | (Cyclophosphamide [600 mg/m <sup>2</sup> iv] + Methotrexate [40 mg/m <sup>2</sup> iv] + 5-Fluorouracil [600 mg/m <sup>2</sup> iv]) q3wk × 9 postop                                                                                                                                                                                                                                                                                                                                                                                                                               |
| IB Bordeaux        | N   | (Epirubicin [50 mg/m <sup>2</sup> ] + Vincristine [1 mg/m <sup>2</sup> ] + Methotrexate [20 mg/m <sup>2</sup> ]) q3wk × 3 pre-op + (Mitomycin-C [10 mg/m <sup>2</sup> ] + Triethylenephosphoramidate [20 mg/m <sup>2</sup> ] + Vindesine [4 mg/m <sup>2</sup> ]) q3wk × 3 pre-op, then Radiotherapy (in absence of residual tumour) or Radiotherapy + (Tumorectomy for < 2cm residual tumour or Patey Mastectomy for > 2cm residual tumour)                                                                                                                                      |
|                    | A   | (Epirubicin [50 mg/m <sup>2</sup> ] + Vincristine [1 mg/m <sup>2</sup> ] + Methotrexate [20 mg/m <sup>2</sup> ]) q3wk × 3 (if N+ or ER-poor or PR-poor) post-op + (Mitomycin-C [10 mg/m <sup>2</sup> ] + Triethylenephosphoramidate [20 mg/m <sup>2</sup> ] + Vindesine [4 mg/m <sup>2</sup> ]) q3wk × 3 for) postop                                                                                                                                                                                                                                                             |
| Institut Curie S6  | N   | (Cyclophosphamide [500 mg/m <sup>2</sup> ] + Doxorubicin [25 mg/m <sup>2</sup> ] + 5-Fluorouracil [500 mg/m <sup>2</sup> ] + P) q4wk × 4 pre-op                                                                                                                                                                                                                                                                                                                                                                                                                                  |
|                    | A   | (Cyclophosphamide [500 mg/m <sup>2</sup> ] + Doxorubicin [25 mg/m <sup>2</sup> ] + 5-Fluorouracil [500 mg/m <sup>2</sup> ] + P) q4wk × 4 postop                                                                                                                                                                                                                                                                                                                                                                                                                                  |
| NSABP B-18         | N   | (Doxorubicin [60mg/m <sup>2</sup> ] + Cyclophosphamide [600mg/m <sup>2</sup> ]) q21d × 4 pre-op                                                                                                                                                                                                                                                                                                                                                                                                                                                                                  |
|                    | A   | (Doxorubicin [60mg/m <sup>2</sup> ] + Cyclophosphamide [600mg/m <sup>2</sup> ]) q21d × 4 postop                                                                                                                                                                                                                                                                                                                                                                                                                                                                                  |
| NSABP B-18         | N   | (Doxorubicin [60mg/m <sup>2</sup> ] + Cyclophosphamide [600mg/m <sup>2</sup> ]) q21d × 4 pre-op + Tamoxifen [20mg/d] to year 5                                                                                                                                                                                                                                                                                                                                                                                                                                                   |
|                    | A   | (Doxorubicin [60mg/m <sup>2</sup> ] + Cyclophosphamide [600mg/m <sup>2</sup> ]) q21d × 4 postop + Tamoxifen [20mg/d] to year 5                                                                                                                                                                                                                                                                                                                                                                                                                                                   |
| St George's London | N   | (Mitoxantrone [7mg/m <sup>2</sup> ] + Methotrexate [30 mg/m <sup>2</sup> ]) q3wk × 4 + Mitomycin-C [7mg/m <sup>2</sup> ] q6wk × 2 + Folinic Acid [15mg × 4 in 24h, 24h after chemo] pre-op + (Mitoxantrone [7mg/m <sup>2</sup> ] + Methotrexate [30 mg/m <sup>2</sup> ]) q3wk × 4 + Mitomycin-C [7mg/m <sup>2</sup> ] q6wk × 2 + Folinic Acid [15mg × 4 in 24h, 24h after chemo] postop if the patient responded to pre-op MMM otherwise (5-Fluorouracil [600mg/m <sup>2</sup> ] + Epirubicin [50mg/m <sup>2</sup> ] + Cyclophosphamide [600mg/m <sup>2</sup> ]) q3wk × 8 postop |
|                    | A   | (Mitoxantrone [7mg/m <sup>2</sup> ] + Methotrexate [30 mg/m <sup>2</sup> ]) q3wk × 8 + Mitomycin-C [7mg/m <sup>2</sup> ] q6wk × 4 + Folinic Acid [15mg × 4 in 24h, 24h after chemo] postop                                                                                                                                                                                                                                                                                                                                                                                       |
| RMH London         | N   | (Mitoxantrone [7mg/m <sup>2</sup> ] + Methotrexate [35 mg/m <sup>2</sup> ]) q3wk × 4 + Mitomycin-C [7mg/m <sup>2</sup> ] q6wk × 2 + Tamoxifen [20 mg/d] pre-op + (Mitoxantrone [7mg/m <sup>2</sup> ] + Methotrexate [35 mg/m <sup>2</sup> ]) q3wk × 4 + Mitomycin-C [7mg/m <sup>2</sup> ] q6wk × 2 postop + Tamoxifen [20 mg/d] to year 5                                                                                                                                                                                                                                        |
|                    | A   | (Mitoxantrone [7mg/m <sup>2</sup> ] + Methotrexate [35 mg/m <sup>2</sup> ]) q3wk × 8 + Mitomycin-C [7mg/m <sup>2</sup> ] q6wk × 4 postop + Tamoxifen [20 mg/d] to year 5                                                                                                                                                                                                                                                                                                                                                                                                         |
| NCI Bethesda       | N   | (5-Fluorouracil [400 mg/m <sup>2</sup> iv] d1,2,3 + Folinic Acid [500 mg/m <sup>2</sup> iv d1,2,3 1 hour before 5-FU] + Doxorubicin [15 mg/m <sup>2</sup> iv] d1,2,3 + Cyclophosphamide [600 mg/m <sup>2</sup> iv] d1 + Mesna [200mg/m <sup>2</sup> iv] + {GM-CSF [10 µg/kg sc daily d4-16] or G-CSF [5 µg/kg sc daily d4-18]}) q3wk × 5 pre-op                                                                                                                                                                                                                                  |
|                    | A   | (5-Fluorouracil [400 mg/m <sup>2</sup> iv] d1,2,3 + Folinic Acid [500 mg/m <sup>2</sup> iv d1,2,3 1 hour before 5-FU] + Doxorubicin [15 mg/m <sup>2</sup> iv] d1,2,3 + Cyclophosphamide [600 mg/m <sup>2</sup> iv] d1 + Mesna [200mg/m <sup>2</sup> iv] + {GM-CSF [10 µg/kg sc daily d4-16] or G-CSF [5 µg/kg sc daily d4-18]}) q3wk × 5 postop                                                                                                                                                                                                                                  |

Continued

**Webtable 2 cont'd: Trial systemic treatments and sequencing with surgery, by allocated treatment (N=neo-adjuvant, A = Adjuvant only)**

| <b>Trial</b>      | <b>Arm</b> | <b>Treatment details</b>                                                                                                                                                                                                                                                                            |
|-------------------|------------|-----------------------------------------------------------------------------------------------------------------------------------------------------------------------------------------------------------------------------------------------------------------------------------------------------|
| Austrian BCSG VII | N          | (Cyclophosphamide [600mg/m <sup>2</sup> d1,8] + Methotrexate [40mg/m <sup>2</sup> d1,8] + 5-Fluorouracil [600mg/m <sup>2</sup> d1,8]) × 3 pre-op + (Cyclophosphamide [600mg/m <sup>2</sup> d1,8] + Methotrexate [40mg/m <sup>2</sup> d1,8] + 5-Fluorouracil [600mg/m <sup>2</sup> d1,8]) × 3 postop |
|                   | A          | (Cyclophosphamide [600mg/m <sup>2</sup> d1,8] + Methotrexate [40mg/m <sup>2</sup> d1,8] + 5-Fluorouracil [600mg/m <sup>2</sup> d1,8]) × 6 postop                                                                                                                                                    |
| Austrian BCSG VII | N          | (Cyclophosphamide [600mg/m <sup>2</sup> d1,8] + Methotrexate [40mg/m <sup>2</sup> d1,8] + 5-Fluorouracil [600mg/m <sup>2</sup> d1,8]) × 3 pre-op+ (Epirubicin [70mg/m <sup>2</sup> d1] + Cyclophosphamide [600mg/m <sup>2</sup> d1]) × 3 postop                                                     |
|                   | A          | (Cyclophosphamide [600mg/m <sup>2</sup> d1,8] + Methotrexate [40mg/m <sup>2</sup> d1,8] + 5-Fluorouracil [600mg/m <sup>2</sup> d1,8]) × 3 postop + (Epirubicin [70mg/m <sup>2</sup> d1] + Cyclophosphamide [600mg/m <sup>2</sup> d1]) × 3 postop                                                    |
| EORTC 10902       | N          | 5-Fluorouracil [600 mg/m <sup>2</sup> iv] + Epirubicin [60 mg/m <sup>2</sup> iv] + Cyclophosphamide [600 mg/m <sup>2</sup> iv] q3wk × 4 pre-op                                                                                                                                                      |
|                   | A          | 5-Fluorouracil [600 mg/m <sup>2</sup> iv] + Epirubicin [60 mg/m <sup>2</sup> iv] + Cyclophosphamide [600 mg/m <sup>2</sup> iv] q3wk × 4 postop                                                                                                                                                      |
| ECTO Italy        | N          | (Epirubicin [60mg/m <sup>2</sup> iv] then Paclitaxel [200mg/m <sup>2</sup> iv over 3h]) q3wk × 4 then (Cyclophosphamide [600mg/m <sup>2</sup> iv d1,8] + Methotrexate [40mg/m <sup>2</sup> iv d1,8] + 5-Fluorouracil [600mg/m <sup>2</sup> iv d1,8]) q4wk × 4 pre-op then Tam [20mg/d] to year 5    |
|                   | A          | (Epirubicin [60mg/m <sup>2</sup> iv] then Paclitaxel [200mg/m <sup>2</sup> iv over 3h]) q3wk × 4 then (Cyclophosphamide [600mg/m <sup>2</sup> iv d1,8] + Methotrexate [40mg/m <sup>2</sup> iv d1,8] + 5-Fluorouracil [600mg/m <sup>2</sup> iv d1,8]) q4wk × 4 postop then Tam [20mg/d] to year 5    |

**Webtable 3: Definitions of tumour response and tumour response assessment within trial**

| Trial                 | Tumour response definition and method of assessment                                                                                                                                                                                                                                                                                                                                                                                                                                                                                                   |
|-----------------------|-------------------------------------------------------------------------------------------------------------------------------------------------------------------------------------------------------------------------------------------------------------------------------------------------------------------------------------------------------------------------------------------------------------------------------------------------------------------------------------------------------------------------------------------------------|
| BCCA<br>Vancouver     | Not measured, as only 1 cycle of preoperative chemotherapy was given                                                                                                                                                                                                                                                                                                                                                                                                                                                                                  |
| IB Bordeaux           | cCR = complete disappearance of all evidence of tumour, PR = residual tumour size $\leq 2$ cm, SD/PD = residual tumour $> 2$ cm<br>Method: clinical examination and mammography. Pathological response not assessed.                                                                                                                                                                                                                                                                                                                                  |
| Institut Curie<br>S6  | cCR = complete disappearance of all evidence of tumour, PR (major) = $\geq 50\%$ reduction in initial tumour size, PR (minor) = 25-50% reduction, SD/PD undefined<br>Method: Clinical examination and mammography (size = greater of the two largest dimensions)                                                                                                                                                                                                                                                                                      |
| NSABP B-18            | cCR = complete disappearance of all evidence of tumour, PR = $\geq 50\%$ reduction in initial tumour size, SD = not CR/PR/PD, PD = $\geq 50\%$ increase in tumour size<br>if cCR then, pCR=no histologic evidence of invasive tumour cells (non-invasive cells allowed), pINV=histologic evidence of invasive cells<br>Method: Clinical size quantified by the product of the two greatest tumour dimensions. Patients with complete clinical response, by physical examination, had their surgical specimens evaluated for pathologic tumour status. |
| St George's<br>London | Employ UICC criteria (use callipers and mammogram). cCR = disappearance of all known disease, cPR = $\geq 50\%$ reduction in initial tumour size,<br>NC = $< 50\%$ reduction or $< 25\%$ increase in size of lesion, PD = some lesions regress whilst others progress or new lesions appear.<br>Method: Tumour size measured with callipers by bi-dimensional measurements, multiplied to give area. Preliminary mammogram and a second 12 weeks before definitive surgery and radiotherapy.                                                          |
| RMH London            | cCR = no palpable abnormality, cPR = $\geq 50\%$ reduction in initial tumour size, NC = $< 50\%$ reduction, PD = $\geq 25\%$ increase in size<br>MRD = residual nodularity, classed within the PR category<br>Method: Palpation and tri-dimensional measurements of tumour size and blood flow using colour Doppler signals using an Acuson XP10 scanner. Mammography and ultrasound before surgery.                                                                                                                                                  |
| NCI Bethesda          | Criteria from "The Breast Cancer Task Force Treatment Committee NCI. Publication 78-1192. DHEW, 1978. cCR = complete disappearance of all evidence of tumour, cPR = $\geq 50\%$ reduction in initial tumour size, PD = $\geq 25\%$ increase or new lesion, SD = not CR/PR/PD<br>Method: Palpation and mammography.                                                                                                                                                                                                                                    |
| Austrian BCSG<br>VII  | pCR = complete disappearance of invasive cancer in final histological specimen of the primary tumour<br>PR = $\geq 50\%$ reduction in initial tumour size, SD = $< 50\%$ reduction, PD = any increase in tumour size<br>Method: Evaluated clinically, radiologically and histologically.                                                                                                                                                                                                                                                              |
| EORTC 10902           | pCR = no signs of malignant cells at primary site or in lymph nodes, cCR = complete disappearance via palpation as well as mammography,<br>PR = $\geq 50\%$ reduction in initial tumour size, PD = $\geq 25\%$ increase in tumour size, or cN0 but developed palpable nodes<br>Method: Palpation and mammography. Product of the two greatest perpendicular diameters used to compare change in tumour size.                                                                                                                                          |
| ECTO Italy            | pCR = no residual invasive cancer in breast, irrespective of nodal status, cCR = no clinical evidence of disease (mammogram or ultrasound) or no new lesions,<br>cPR = $\geq 50\%$ reduction in initial tumour size, cPR minor = $\geq 25\%$ but $< 50\%$ reduction, PD = $\geq 50\%$ increase in tumour size or new lesion<br>Method: Physical examination. Mammography or ultrasound after chemotherapy completion. Surgical specimens evaluated for pathologic response.                                                                           |

Abbreviations: CR = complete response, PR = partial response, SD = stable disease, NC = no change, PD = progressive disease, c = clinical, p = pathological

Webtable 4: Participant characteristics, by trial

| Characteristic                                | Category               | BCCA<br>Vancouver | IB<br>Bordeaux | Institut<br>Curie S6 | NSABP<br>B-18 | St George's<br>London | RMH<br>London | NCI<br>Bethesda | Austrian<br>BCSG VII | EORTC<br>10902 | ECTO<br>Italy | Total       |
|-----------------------------------------------|------------------------|-------------------|----------------|----------------------|---------------|-----------------------|---------------|-----------------|----------------------|----------------|---------------|-------------|
| Age at entry<br>(years)                       | <45                    | 66                | 60             | 176                  | 505           | 19                    | 48            | 25              | 121                  | 242            | 252           | 1514        |
|                                               | 45-54                  | 15                | 81             | 191                  | 489           | 40                    | 100           | 14              | 162                  | 249            | 338           | 1679        |
|                                               | 55+                    | 0                 | 131            | 23                   | 529           | 44                    | 157           | 14              | 146                  | 207            | 312           | 1563        |
| Clinical nodal<br>status                      | Negative               | 47                | 0              | 161                  | 1115          | 0                     | 247           | 0               | 262                  | 333            | 498           | 2663        |
|                                               | Positive               | 19                | 0              | 226                  | 408           | 0                     | 58            | 0               | 150                  | 355            | 381           | 1597        |
|                                               | Unknown                | 15                | 272            | 3                    | 0             | 103                   | 0             | 53              | 17                   | 10             | 23            | 496         |
| Tumour size                                   | 1-19 mm                | 22                | 5              | 10                   | 415           | 33                    | 79            | 0               | 103                  | 96             | 26            | 789         |
|                                               | 20-49 mm               | 31                | 243            | 276                  | 908           | 52                    | 210           | 0               | 272                  | 404            | 739           | 3135        |
|                                               | 50+ mm                 | 3                 | 24             | 103                  | 200           | 18                    | 13            | 0               | 39                   | 150            | 122           | 672         |
|                                               | Other/unknown          | 25                | 0              | 1                    | 0             | 0                     | 3             | 53              | 15                   | 48             | 15            | 160         |
| Biopsy grade                                  | Well                   | 0                 | 39             | 0                    | 0             | 0                     | 0             | 0               | 0                    | 0              | 88            | 127         |
|                                               | Moderate               | 6                 | 145            | 0                    | 0             | 0                     | 0             | 0               | 0                    | 0              | 482           | 633         |
|                                               | Poor                   | 18                | 72             | 0                    | 0             | 0                     | 0             | 0               | 0                    | 0              | 304           | 394         |
|                                               | Unknown                | 57                | 16             | 390                  | 1523          | 103                   | 305           | 53              | 429                  | 698            | 28            | 3602        |
| Biopsy ER status                              | ER-poor                | 34                | 161            | 152                  | 0             | 103                   | 0             | 0               | 364                  | 122            | 340           | 1276        |
|                                               | ER-positive            | 40                | 111            | 192                  | 0             | 0                     | 0             | 0               | 42                   | 313            | 548           | 1246        |
|                                               | Unknown                | 7                 | 0              | 46                   | 1523          | 0                     | 305           | 53              | 23                   | 263            | 14            | 2234        |
| Biopsy PR status                              | PR-poor                | 7                 | 161            | 156                  | 0             | 0                     | 0             | 0               | 332                  | 0              | 383           | 1039        |
|                                               | PR-positive            | 14                | 110            | 187                  | 0             | 0                     | 0             | 0               | 66                   | 0              | 501           | 878         |
|                                               | Unknown                | 60                | 1              | 47                   | 1523          | 103                   | 305           | 53              | 31                   | 698            | 18            | 2839        |
| Treatment allocation<br>and clinical response | Neoadjuvant - Complete | 0                 | 30             | 0                    | 240           | 17                    | 27            | 0               | 25                   | 23             | 184           | 546         |
|                                               | - Partial              | 0                 | 32             | 0                    | 304           | 14                    | 93            | 0               | 104                  | 148            | 108           | 803         |
|                                               | - Stable/progressive   | 0                 | 64             | 0                    | 140           | 21                    | 23            | 0               | 49                   | 144            | 157           | 598         |
|                                               | - Unknown              | 42                | 8              | 200                  | 76            | 1                     | 12            | 26              | 38                   | 35             | 2             | 440         |
|                                               | Adjuvant only          | 39                | 138            | 190                  | 763           | 50                    | 150           | 27              | 213                  | 348            | 451           | 2369        |
| Planned local<br>therapy                      | Radiotherapy only      | 0                 | 0              | 390                  | 0             | 0                     | 0             | 0               | 0                    | 0              | 0             | 390         |
|                                               | Lumpectomy             | 22                | 0              | 0                    | 996           | 85                    | 79            | 0               | 103                  | 152            | 26            | 1463        |
|                                               | Mastectomy             | 3                 | 272            | 0                    | 527           | 18                    | 13            | 0               | 39                   | 536            | 122           | 1530        |
|                                               | Unknown                | 56                | 0              | 0                    | 0             | 0                     | 213           | 53              | 287                  | 10             | 754           | 1373        |
| <b>Total</b>                                  | <b>All women</b>       | <b>81</b>         | <b>272</b>     | <b>390</b>           | <b>1523</b>   | <b>103</b>            | <b>305</b>    | <b>53</b>       | <b>429</b>           | <b>698</b>     | <b>902</b>    | <b>4756</b> |

ER = Oestrogen receptor, PR = Progesterone receptor

Webfigure 1: Rate ratios for effect of neo-adjuvant versus adjuvant chemotherapy on mortality by trial

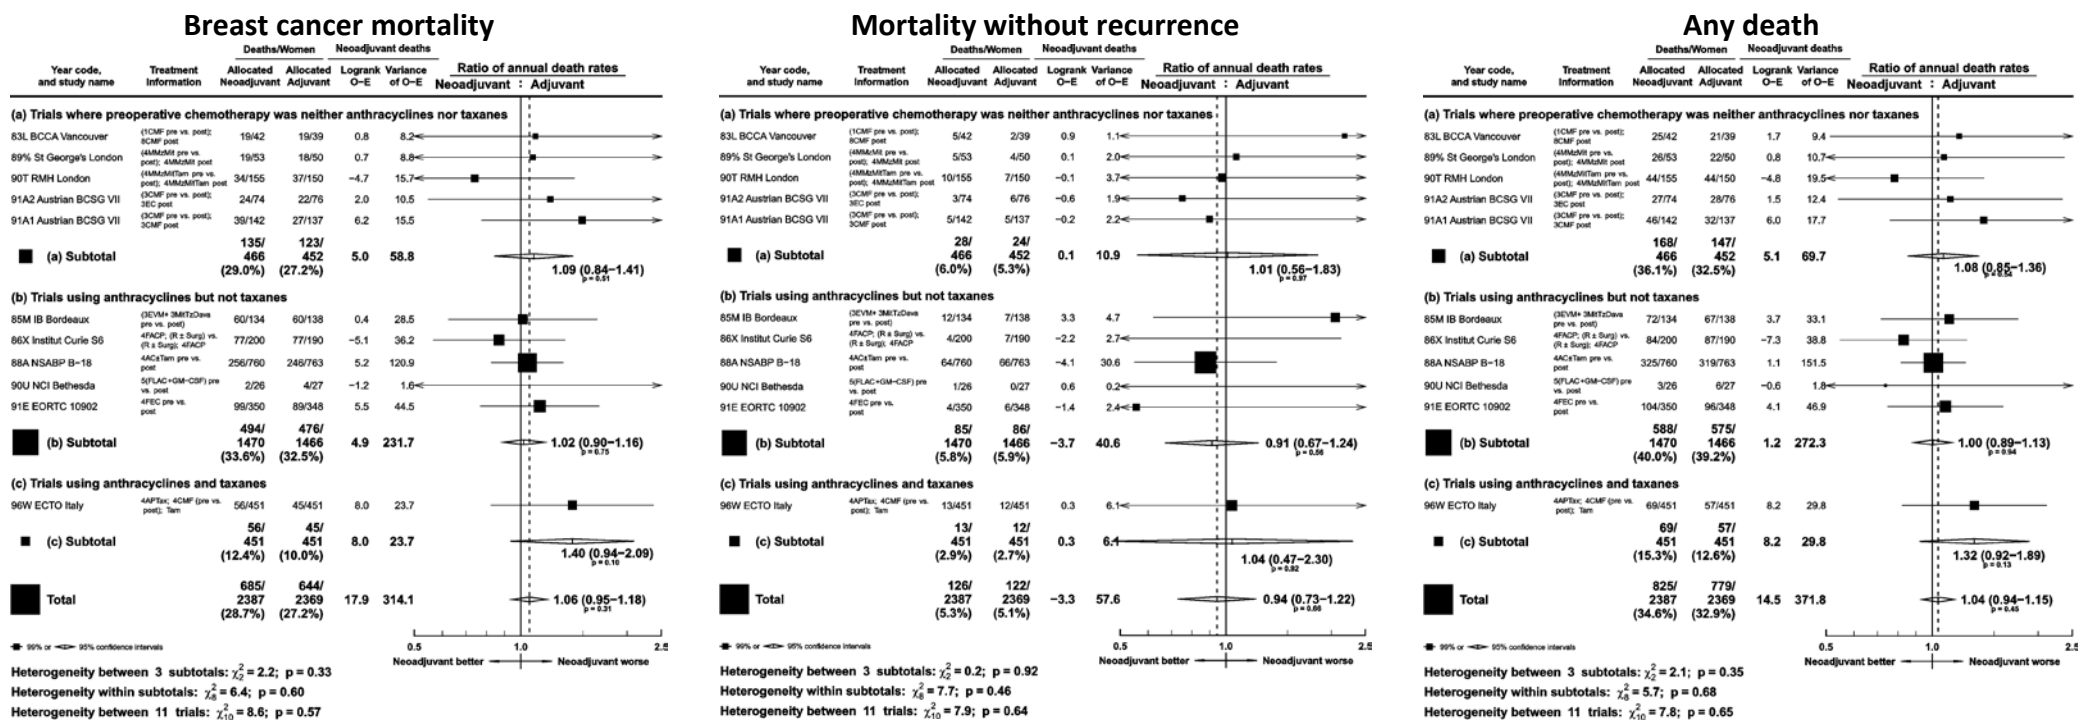



**Webtable 5: Breast tumour clinical response in women randomised to neo-adjuvant chemotherapy**

| Breast tumour clinical response*   | Number of women | Percentage         |                                         |
|------------------------------------|-----------------|--------------------|-----------------------------------------|
|                                    |                 | All women (n=2387) | Women only with known response (n=1947) |
| Complete (CR)                      | 546             | 23                 | 28                                      |
| Partial (PR)                       | 803             | 34                 | 41                                      |
| Stable/progressive disease (SD/PD) | 598             | 25                 | 31                                      |
| Unknown                            | 440             | 18                 | -                                       |
| <b>Total</b>                       | <b>2387</b>     | <b>100</b>         | <b>100</b>                              |

\*CR = no clinical evidence of disease, PR =  $\geq 50\%$  reduction in initial tumour size, SD/PD =  $< 50\%$  reduction, or increase in size.

Information on individual responses was not available from the Institut Curie S6 and NCI Bethesda trials, but publications from those two trials have reported the numbers of women with CR/PR/SD or PD/Unk to be 46/80/27/47 and 11/2/4/9 respectively.

BCCA Vancouver gave only one cycle of neo-adjuvant chemotherapy, and did not record the clinical response to it.

**Webtable 6: Planned surgery versus surgery actually undertaken, by trial and allocated treatment**

| Trial              | Surgery undertaken | Planned surgery |            |            |            |             |            |            |            |            |             |
|--------------------|--------------------|-----------------|------------|------------|------------|-------------|------------|------------|------------|------------|-------------|
|                    |                    | Neo-adjuvant    |            |            |            |             | Adjuvant   |            |            |            |             |
|                    |                    | RT only         | Lx         | Mx         | Unk        | Total       | RT only    | Lx         | Mx         | Unk        | Total       |
| BCCA Vancouver     | No surgery         |                 |            |            | 1          | <b>1</b>    |            | 1          |            |            | <b>1</b>    |
|                    | Lumpectomy         |                 | 6          |            | 7          | <b>13</b>   |            | 3          |            | 9          | <b>12</b>   |
|                    | Mastectomy         |                 | 7          |            | 21         | <b>28</b>   |            | 5          | 3          | 18         | <b>26</b>   |
| IB Bordeaux        | No surgery         |                 |            |            | 30         | <b>30</b>   |            |            |            |            |             |
|                    | Lumpectomy         |                 |            |            | 32         | <b>32</b>   |            |            |            |            |             |
|                    | Mastectomy         |                 |            |            | 64         | <b>64</b>   |            |            | 138        |            | <b>138</b>  |
|                    | Unknown            |                 |            |            | 8          | <b>8</b>    |            |            |            |            |             |
| Institut Curie S6  | Lumpectomy*        | 167             |            |            |            | <b>167</b>  | 144        |            |            |            | <b>144</b>  |
|                    | Mastectomy         | 33              |            |            |            | <b>33</b>   | 46         |            |            |            | <b>46</b>   |
| NSABP B-18         | No surgery         |                 | 6          | 2          |            | <b>8</b>    |            | 1          | 4          |            | <b>5</b>    |
|                    | Lumpectomy         |                 | 440        | 70         |            | <b>510</b>  |            | 419        | 35         |            | <b>454</b>  |
|                    | Mastectomy         |                 | 50         | 192        |            | <b>242</b>  |            | 80         | 223        |            | <b>303</b>  |
|                    | Unknown            |                 |            |            |            |             |            |            | 1          |            | <b>1</b>    |
| St George's London | No surgery         |                 | 7          | 3          |            | <b>10</b>   |            | 1          | 1          |            | <b>2</b>    |
|                    | Lumpectomy         |                 | 31         | 4          |            | <b>35</b>   |            | 41         | 1          |            | <b>42</b>   |
|                    | Mastectomy         |                 | 5          | 3          |            | <b>8</b>    |            |            | 6          |            | <b>6</b>    |
| RMH London         | Lumpectomy         |                 | 34         | 5          | 98         | <b>137</b>  |            | 40         | 4          | 72         | <b>116</b>  |
|                    | Mastectomy         |                 | 2          | 1          | 13         | <b>16</b>   |            | 3          | 3          | 26         | <b>32</b>   |
|                    | Unknown            |                 |            |            | 2          | <b>2</b>    |            |            |            | 2          | <b>2</b>    |
| NCI Bethesda       | Unknown            |                 |            |            | 26         | <b>26</b>   |            |            |            | 27         | <b>27</b>   |
| Austrian BCSG VII  | Lumpectomy         |                 | 36         | 4          | 93         | <b>133</b>  |            | 39         | 2          | 78         | <b>119</b>  |
|                    | Mastectomy         |                 | 10         | 14         | 41         | <b>65</b>   |            | 14         | 15         | 54         | <b>83</b>   |
|                    | Unknown            |                 | 2          | 3          | 13         | <b>18</b>   |            | 2          | 1          | 8          | <b>11</b>   |
| EORTC 10902        | No surgery         |                 |            | 20         | 3          | <b>23</b>   |            | 1          | 9          | 6          | <b>16</b>   |
|                    | Lumpectomy         |                 | 63         | 57         | 1          | <b>121</b>  |            | 64         | 13         |            | <b>77</b>   |
|                    | Mastectomy         |                 | 15         | 191        |            | <b>206</b>  |            | 9          | 246        |            | <b>255</b>  |
| ECTO Italy         | Lumpectomy         |                 | 11         | 25         | 248        | <b>284</b>  |            | 13         | 4          | 130        | <b>147</b>  |
|                    | Mastectomy         |                 | 1          | 37         | 116        | <b>154</b>  |            | 1          | 50         | 243        | <b>294</b>  |
|                    | Unknown            |                 |            | 3          | 10         | <b>13</b>   |            |            | 3          | 7          | <b>10</b>   |
| All trials         | No Surgery         |                 | 13         | 55         | 4          | <b>72</b>   |            | 4          | 14         | 6          | <b>24</b>   |
|                    | Lumpectomy         | 167             | 621        | 197        | 447        | <b>1432</b> | 144        | 619        | 59         | 289        | <b>1111</b> |
|                    | Mastectomy         | 33              | 90         | 502        | 191        | <b>816</b>  | 46         | 112        | 684        | 341        | <b>1183</b> |
|                    | Unknown            |                 | 2          | 14         | 51         | <b>67</b>   |            | 2          | 5          | 44         | <b>51</b>   |
|                    | <b>Total</b>       | <b>200</b>      | <b>726</b> | <b>768</b> | <b>693</b> | <b>2387</b> | <b>190</b> | <b>737</b> | <b>762</b> | <b>680</b> | <b>2369</b> |

Lx = Lumpectomy, Mx = Mastectomy, RT = Radiotherapy

In the adjuvant arms, 80% with clinical tumour size <2 cm had lumpectomy and 80% with tumour size ≥5 cm had mastectomy. Hence, if the planned surgery was unknown, it was taken as lumpectomy if size was <2 cm and mastectomy if size was ≥5 cm. This convention was used to re-categorise 408 women. (Clinical nodal status was not a good predictor of planned surgery.)

\*In the Institut Curie S6 trial, lumpectomy includes "No surgery", and information on each individual was not available. Publications from this trial have reported RT only 102 neo-adjuvant vs 87 adjuvant and BCS+RT 62 neo-adjuvant vs 60 adjuvant.

**Webfigure 2: Planned surgery versus surgery actually undertaken, by allocated treatment group**

A) Excluding trials IB Bordeaux and Institut Curie S6

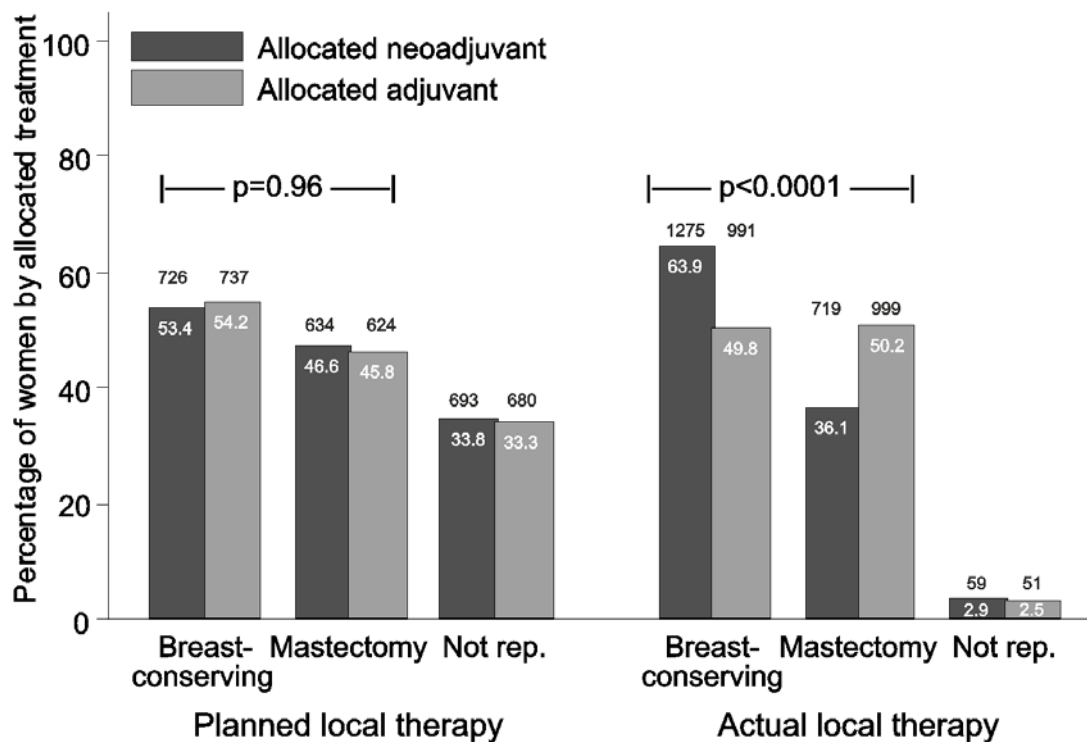

B) Including all trials

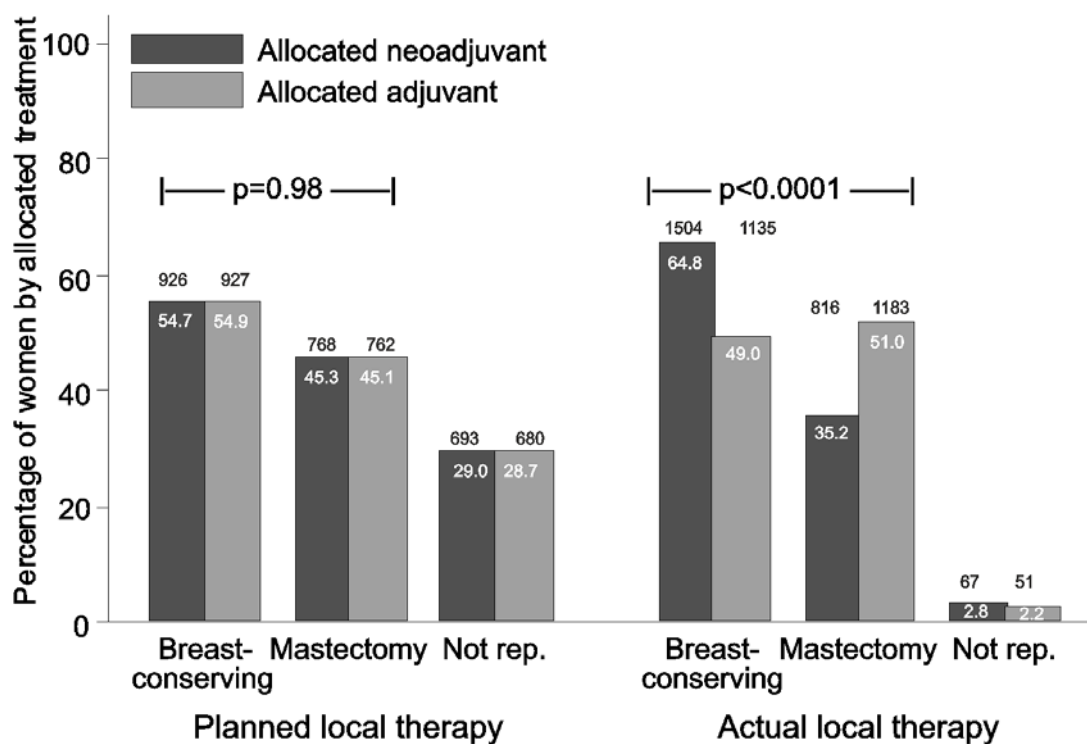

Percentages for breast-conserving and mastectomy exclude unknowns. Percentages for unknowns show the fraction of the total number of patients, in the respective allocated treatment groups, with missing local therapy information.

**Webtable 7: Local recurrence in women randomised to neo-adjuvant chemotherapy by their sequence of planned and actual local therapy.**

For women randomised to neo-adjuvant chemotherapy, the table shows the *crude* 10-year cumulative risk of local recurrence according to their combination of planned surgery (ie decision before any chemotherapy) and the surgery they actually received (after chemotherapy). It also shows the hazard ratios for local recurrence for these women by surgery sequence, unadjusted and adjusted for clinical tumour size and stratified by trial.

| Planned/<br>Actual<br>Surgery e | Unadjusted<br>local recurrence<br>risk % at year 10<br>(95% CI) | Unadjusted<br>hazard ratio (HR)* |              | Adjusted<br>hazard ratio (HR)* |              |
|---------------------------------|-----------------------------------------------------------------|----------------------------------|--------------|--------------------------------|--------------|
|                                 |                                                                 | HR                               | 95% CI       | HR                             | 95% CI       |
| Mx/BCT<br>(n=252)               | 23.4 (17.8, 30.2)                                               | 1.00                             | (0.76, 1.32) | 1.00                           | (0.73, 1.36) |
| Mx/Mx<br>(n=502)                | 19.8 (15.7, 24.8)                                               | 0.88                             | (0.70, 1.11) | 0.97                           | (0.75, 1.25) |
| BCT/BCT<br>(n=801)              | 21.2 (18.2, 24.6)                                               | 0.96                             | (0.83, 1.12) | 0.84                           | (0.65, 1.10) |
| BCT/Mx<br>(n=123)               | 13.7 (8.2, 22.4)                                                | 0.52                             | (0.31, 0.88) | 0.39                           | (0.22, 0.68) |
| P for<br>heterogeneity          |                                                                 | 0.09                             |              | 0.01                           |              |

BCT = breast-conserving therapy (ie radiotherapy alone or lumpectomy with or without radiotherapy), Mx = Mastectomy.

Planned surgery is labelled first and actual surgery last ie, planned/actual. Planned surgery may differ from actual surgery if the response of the breast tumour to neo-adjuvant chemotherapy leads to de-escalation of the planned extent of local therapy.

\* HR = hazard ratio for the planned/actual surgery group relative to the Mx/BCT group, derived from a Cox regression either unadjusted, or adjusted for clinical tumour size and stratified by trial. Confidence intervals are group specific (Plummer 2004).

#### Reference

Plummer M. Improved estimates of floating absolute risk. *Stat Med* 2004; **23**(1): 93-104.

**Webfigure 3: Rate ratios for effect of neo-adjuvant versus adjuvant chemotherapy on local recurrence by extent of planned local therapy and trial**

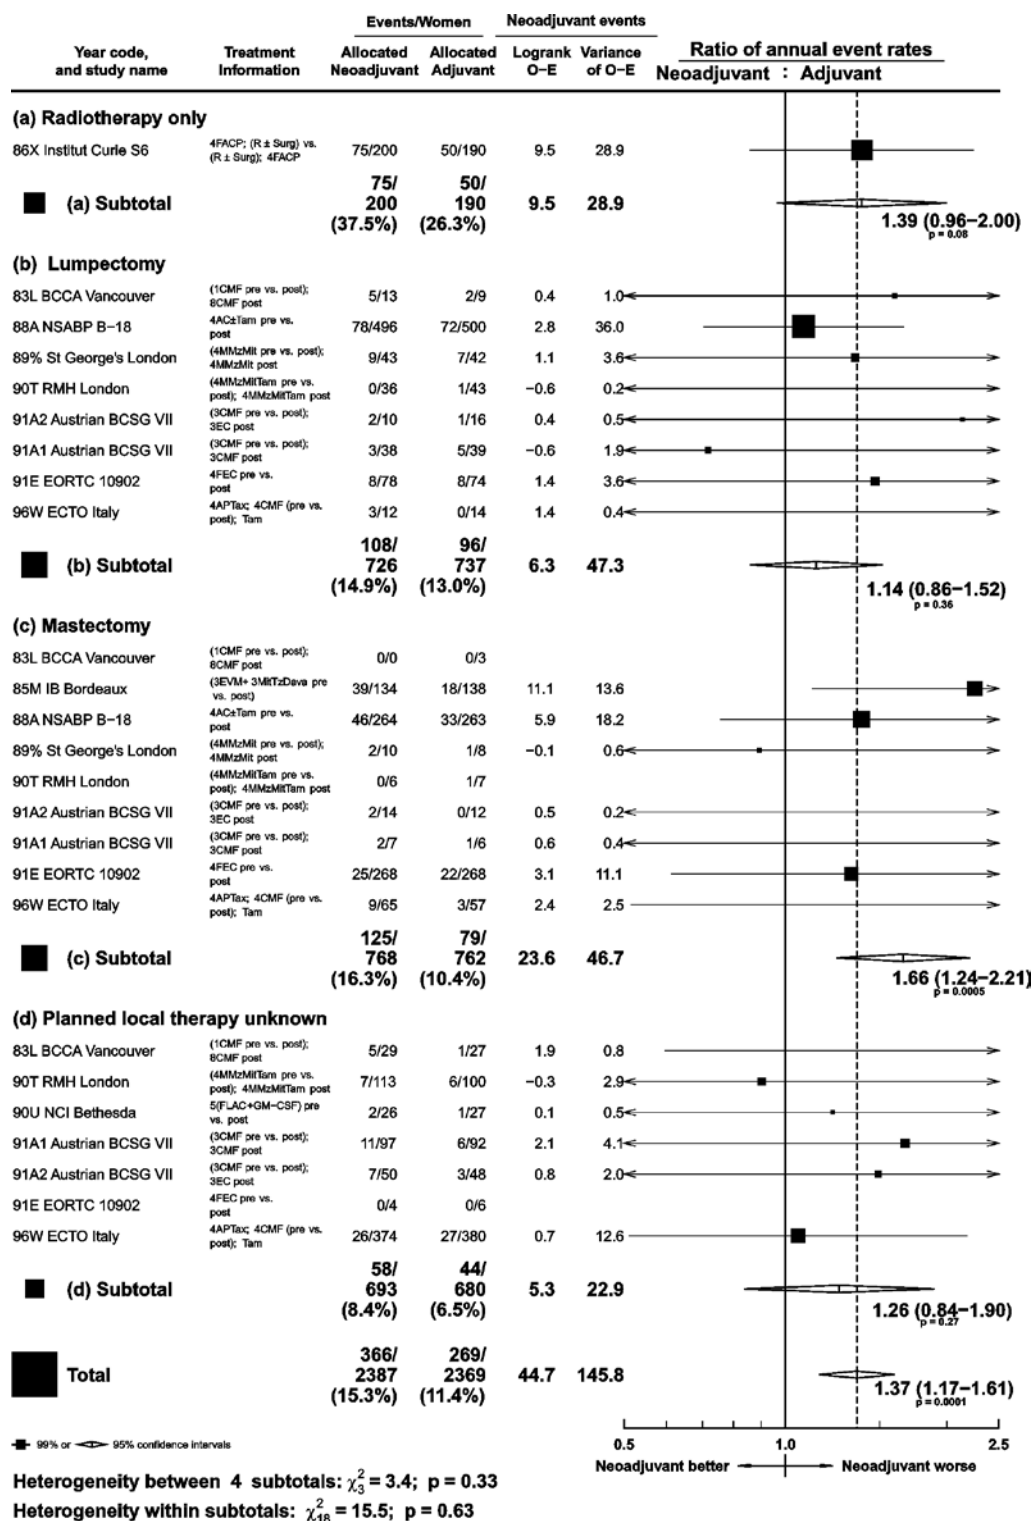

Abbreviations CMF, cyclophosphamide, methotrexate, 5-fluorouracil; MMzMit, methotrexate, mitoxantrone, mitomycin-C; EVM/MitTzDAVA, epirubicin, vincristine, methotrexate/Mitomycin-C, triethylenephosphoramidate, vindesine; FAC, fluorouracil, doxorubicin, cyclophosphamide; AC, doxorubicin, cyclophosphamide; Tam, tamoxifen; FLAC, fluorouracil, leucovorin, doxorubicin, cyclophosphamide; GM-CSF, granulocyte-macrophage colony-stimulating factor; FEC, fluorouracil, epirubicin, cyclophosphamide; APTax, doxorubicin, paclitaxel.

See Webtable 2 for a full description of each chemotherapy regimen.

Webfigure 4: Rate ratios for effect of neo-adjuvant versus adjuvant chemotherapy on recurrence and breast cancer mortality by various factors

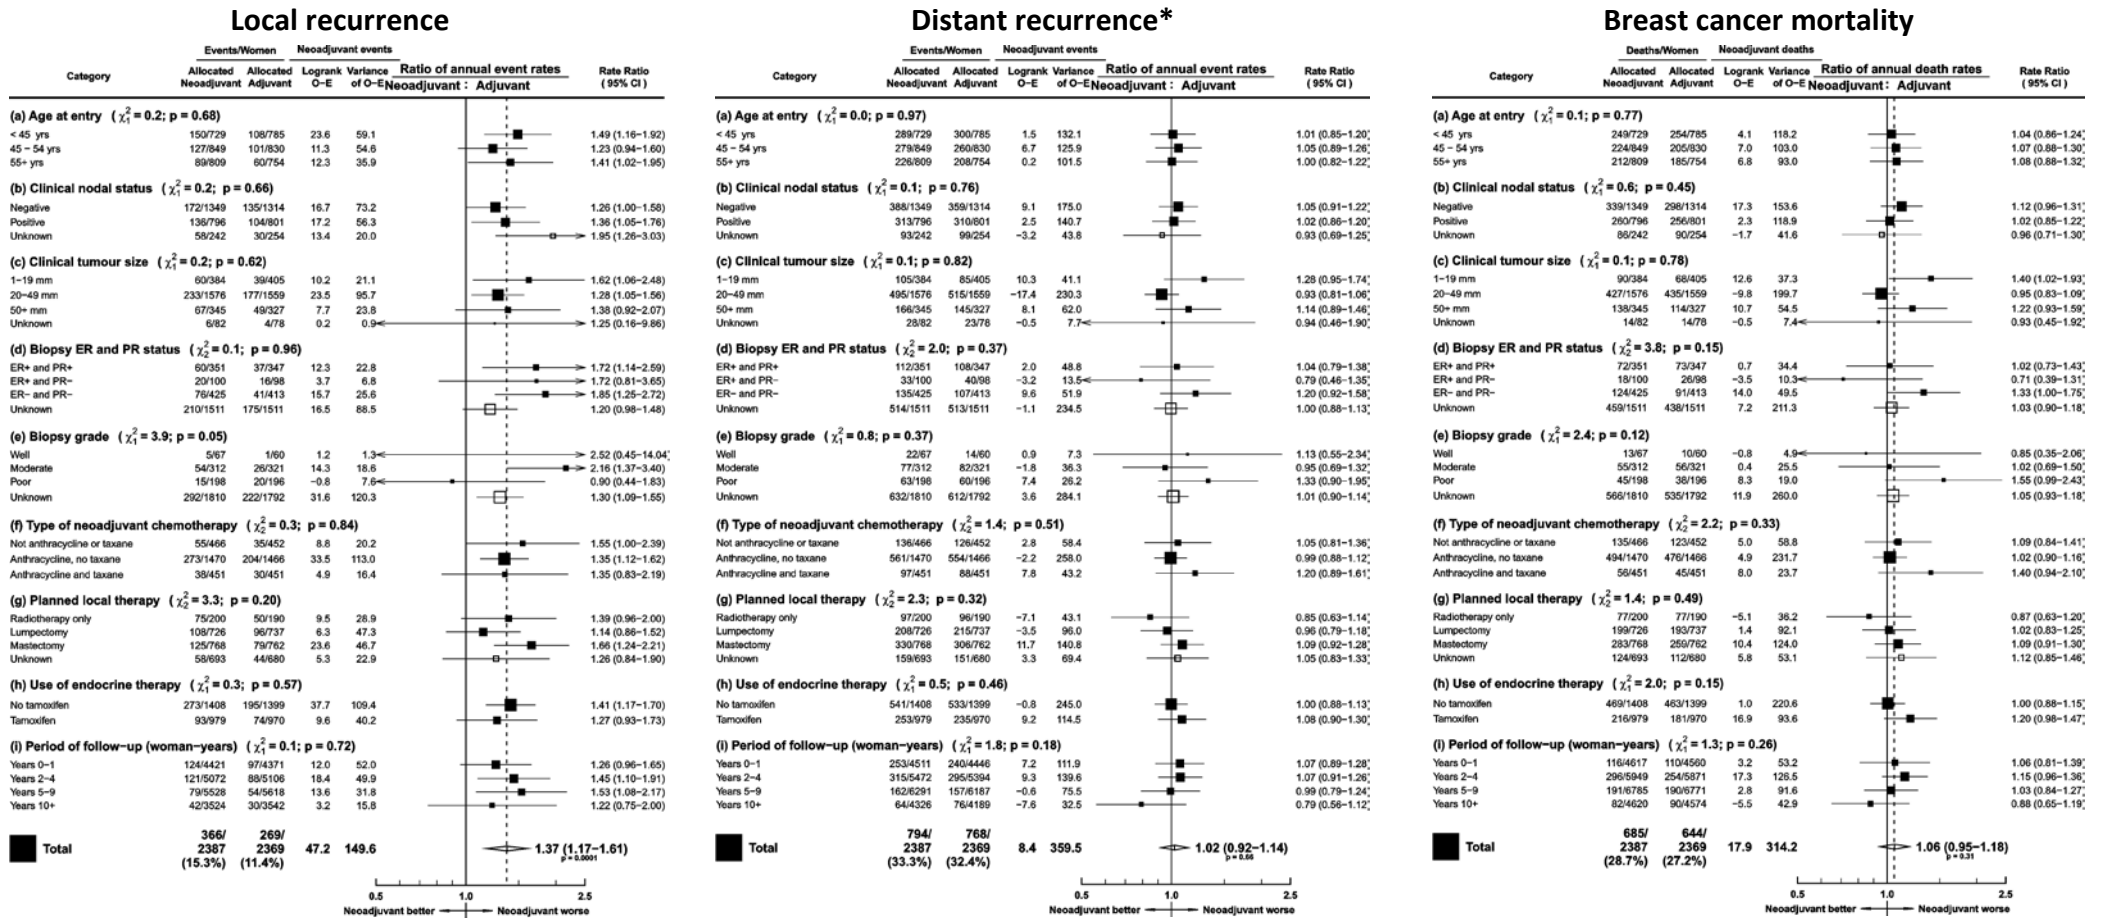

\* NSABP B-18, NCI Bethesda, and Austrian BCSG VII recorded only the first event, so distant recurrence means either distant recurrence as first event or death from breast cancer.

**Webfigure 5: Comparison of women who had either a complete, partial or no clinical response to neoadjuvant chemotherapy to all women randomised to adjuvant chemotherapy for recurrence and mortality (largely reflects patient selection rather than treatment effect)**

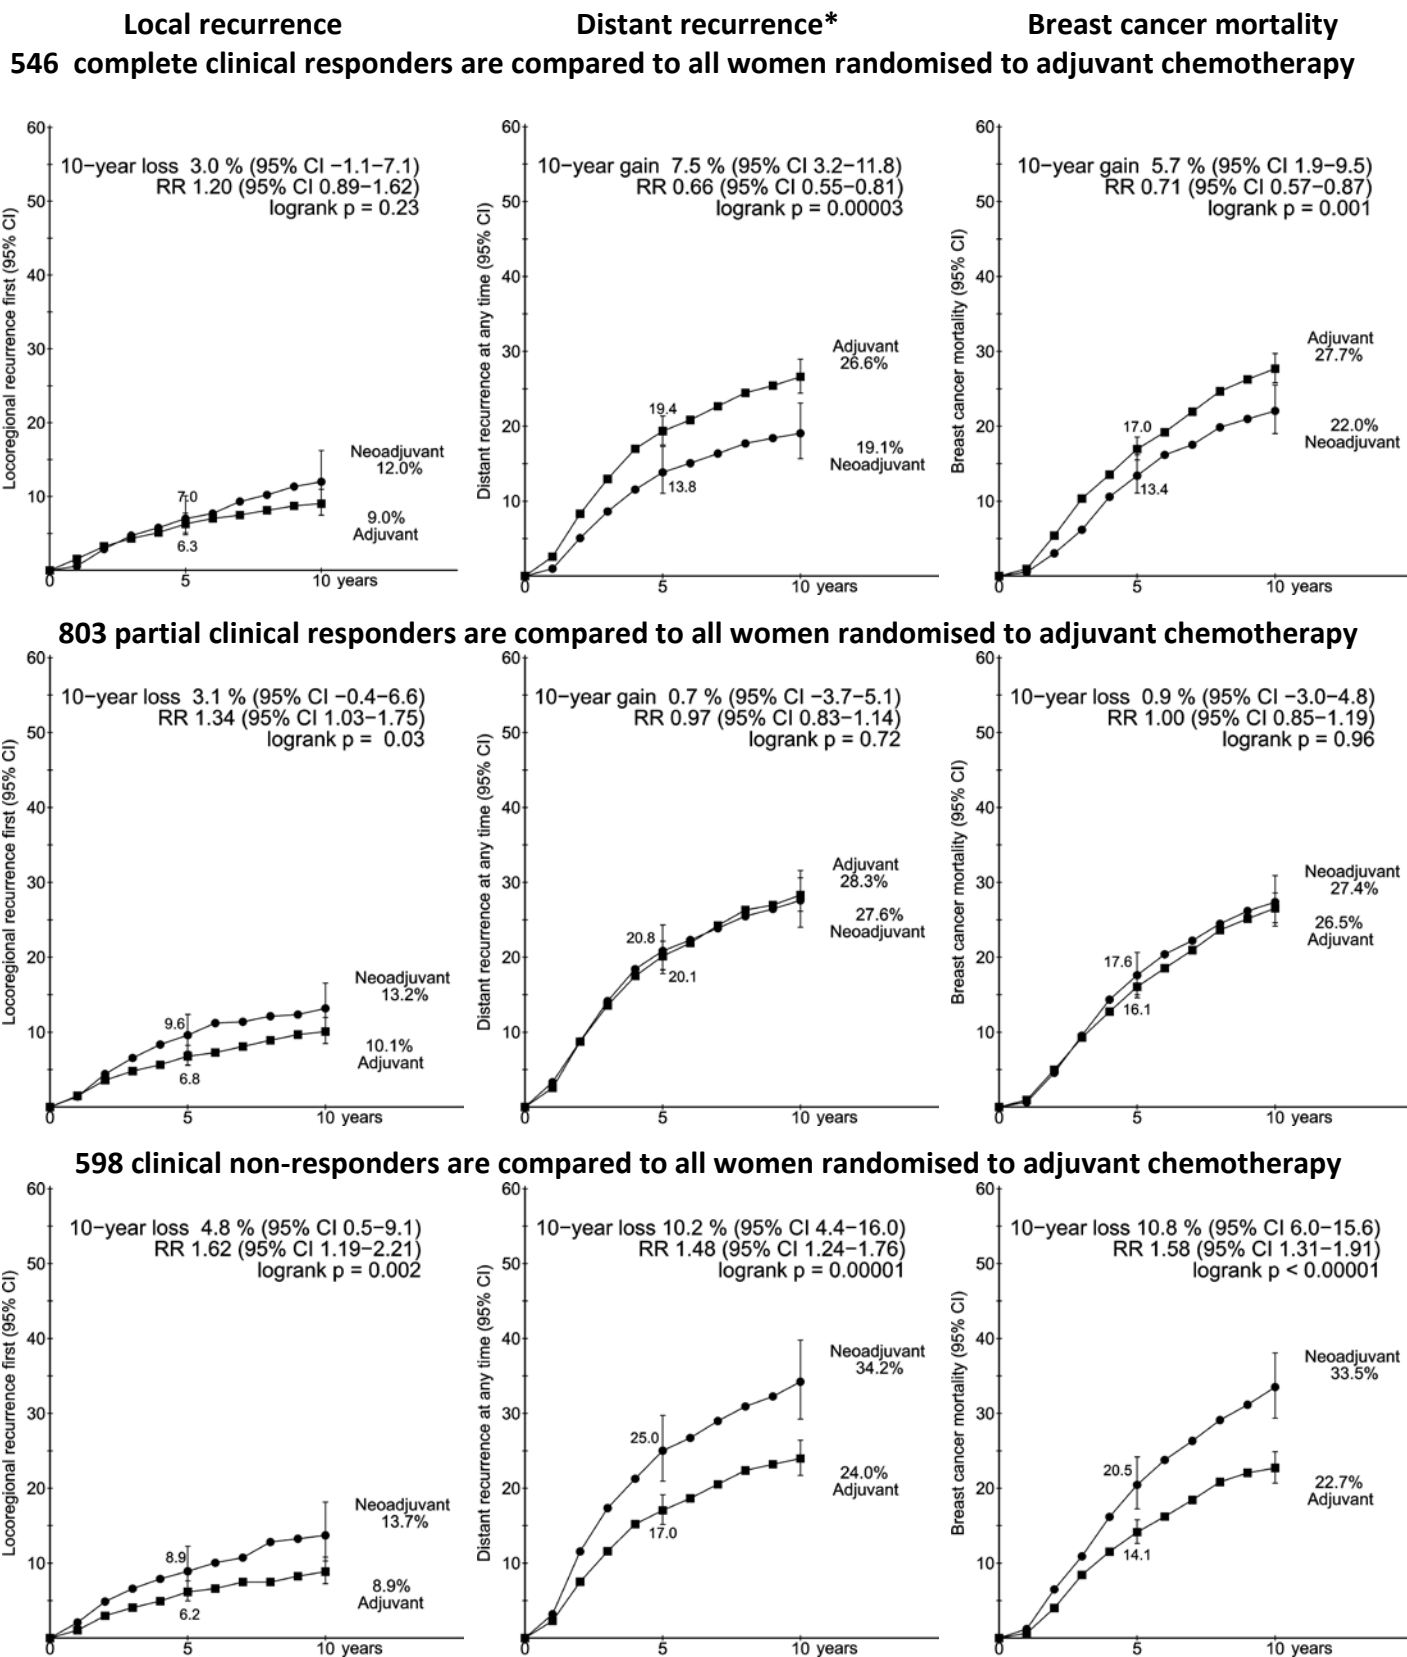

Analyses stratified by trial, follow-up year, age at entry, pre-randomisation clinical nodal status and tumour size. BCCA Vancouver, Institut Curie S6 and NCI Bethesda trials are excluded because individual breast responses were not available. Complete response: no clinical evidence of disease, partial response:  $\geq 50\%$  reduction in initial tumour size, non-response:  $< 50\%$  reduction or increase. \*NSABP B-18 and Austrian BCSG VII recorded only first events, so distant recurrence means as first event, or breast cancer death.

Webfigure 6: Percentage complete clinical response (CR) by trial and breast-conserving therapy rate

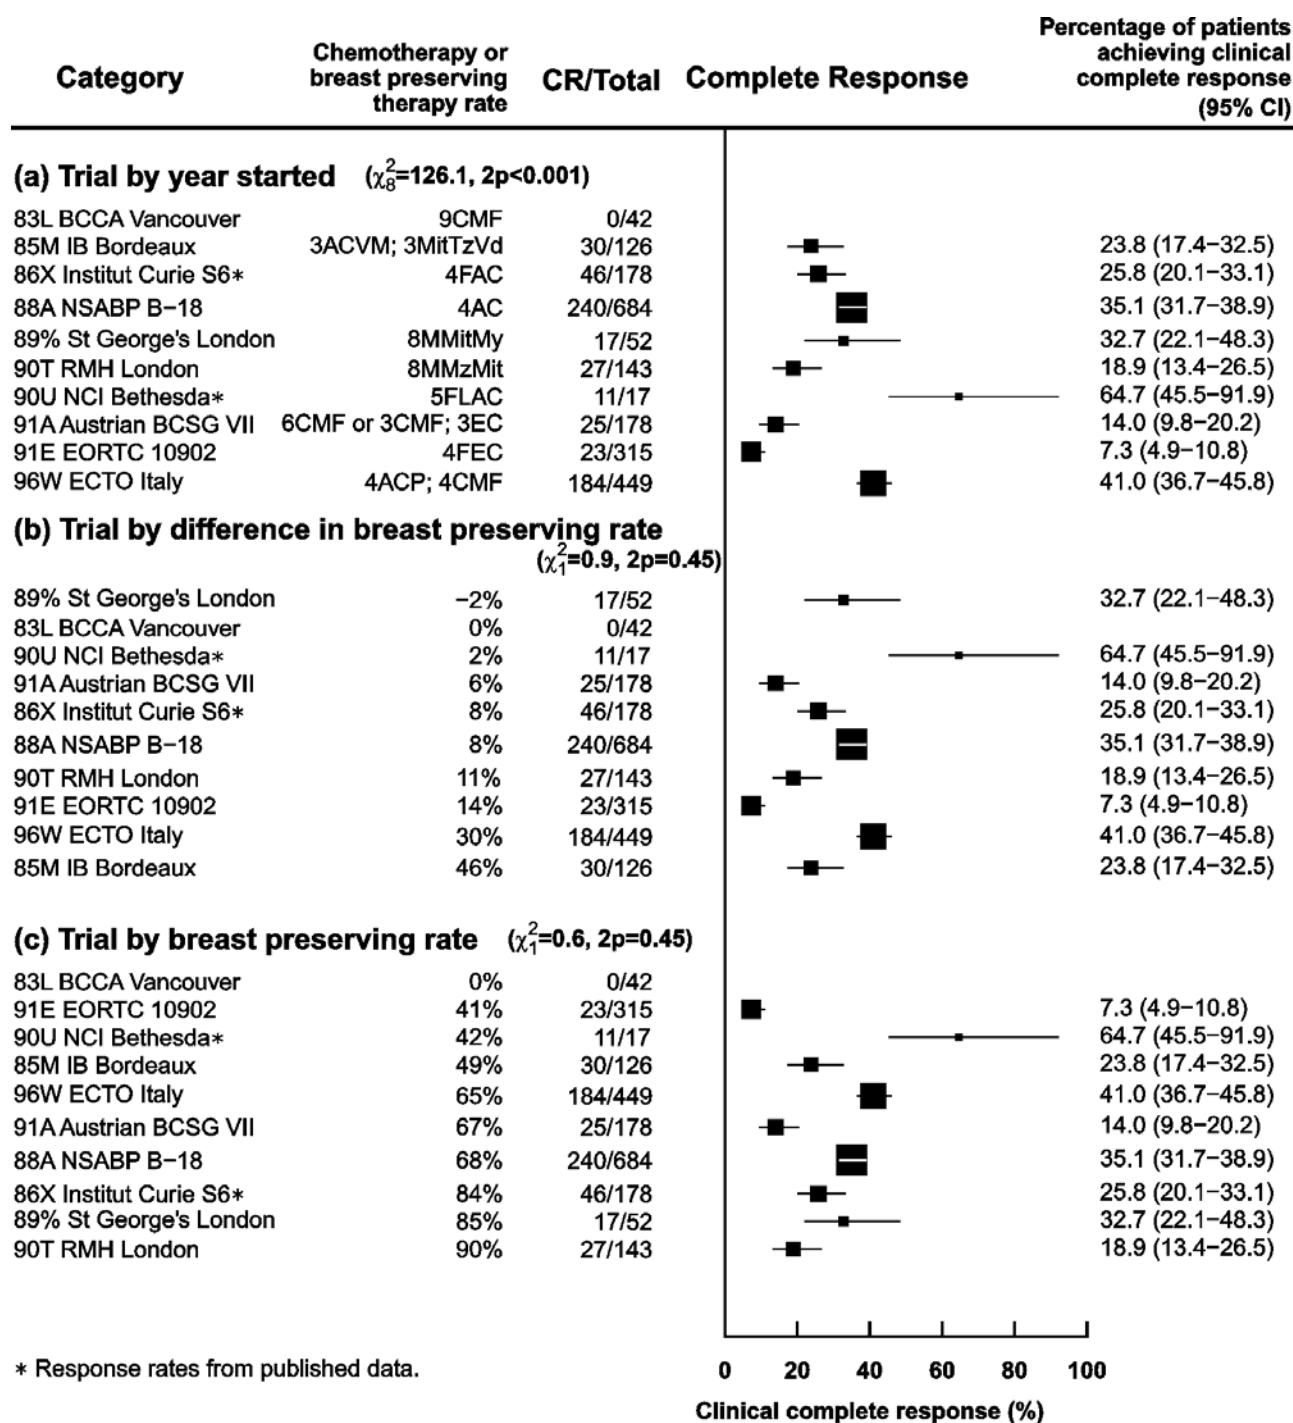

As BCCA Vancouver gave only course of CMF pre-operatively, it is assumed here that CR=0.

Category (b): Difference is between the breast-conserving rate in the adjuvant-only and the neo-adjuvant arms.



**Webfigure 7: Rate ratios for effect of neo-adjuvant versus adjuvant chemotherapy on recurrence and breast cancer mortality by trial and by percentage of women with breast tumour complete clinical response and breast-conserving rate**

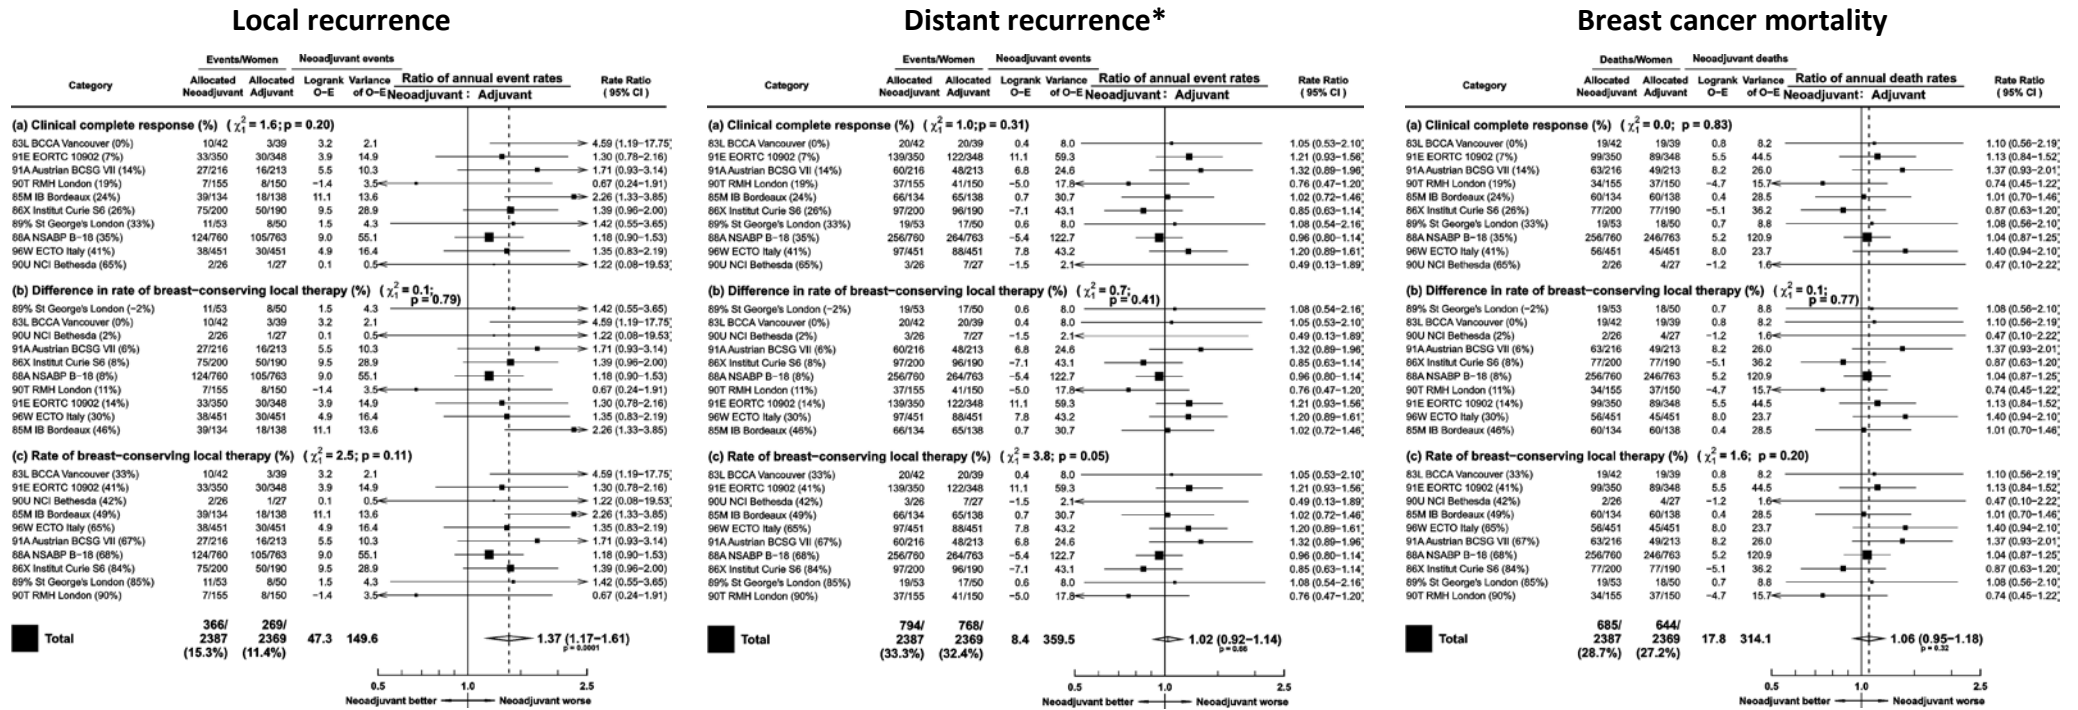

As BCCA Vancouver gave only course of CMF pre-operatively, it is assumed here that CR=0.

Tumour response and breast-conserving rates not available as individual data for all trials and therefore are taken from trial publications (Institut Curie S6 and NCI Bethesda).

\*NSABP B-18 and Austrian BCSG VII recorded only first events, so distant recurrence means either distant recurrence as first event, or breast cancer death.

**Webtable 8: Eligible randomised trials identified but not available for analysis; total ~500 patients**

|                    |                                                                                                                                                                                                                                                                                                                                                                                                                                                                             |
|--------------------|-----------------------------------------------------------------------------------------------------------------------------------------------------------------------------------------------------------------------------------------------------------------------------------------------------------------------------------------------------------------------------------------------------------------------------------------------------------------------------|
| <b>Trial</b>       | <b>Institut Curie S5 - France (1983-1986)</b>                                                                                                                                                                                                                                                                                                                                                                                                                               |
| <b>Description</b> | 196 patients entered; trial terminated early, with much incomplete or omitted treatment.                                                                                                                                                                                                                                                                                                                                                                                    |
| <b>Arms</b>        | (Doxorubicin [25mg/m <sup>2</sup> d1,8]+Cyclophosphamide [400mg/m <sup>2</sup> d1,8]+5-Fluorouracil [500mg/m <sup>2</sup> d1,3,5,8]) q4w ×2 pre-op<br>(Doxorubicin [25mg/m <sup>2</sup> d1,8]+Cyclophosphamide [400mg/m <sup>2</sup> d1,8]+5-Fluorouracil [500mg/m <sup>2</sup> d1,3,5,8]) q4w ×4 postop<br>vs<br>(Doxorubicin [25mg/m <sup>2</sup> d1,8]+Cyclophosphamide [400mg/m <sup>2</sup> d1,8]+5-Fluorouracil [500mg/m <sup>2</sup> d1,3,5,8]) q4w ×6 postop        |
| <b>Reference</b>   | <i>Scholl SM, Asselain B, Palangie T et al. Neoadjuvant chemotherapy in operable breast cancer. Eur J Ca 1991; 27: 1668-71.</i>                                                                                                                                                                                                                                                                                                                                             |
| <b>Trial</b>       | <b>All-India Institute of Medical Sciences, New Delhi - India (1997-2001)</b>                                                                                                                                                                                                                                                                                                                                                                                               |
| <b>Description</b> | 101 patients entered; all received radiotherapy                                                                                                                                                                                                                                                                                                                                                                                                                             |
| <b>Arms</b>        | (Cyclophosphamide [500mg/m <sup>2</sup> d1,15]+Epirubicin [50mg/m <sup>2</sup> d1,15]+5-Fluorouracil [500mg/m <sup>2</sup> d1,15])q4wk ×3 pre-op<br>(Cyclophosphamide [500mg/m <sup>2</sup> d1,15]+Epirubicin [50mg/m <sup>2</sup> d1,15]+5-Fluorouracil [500mg/m <sup>2</sup> d1,15])q4wk ×3 postop<br>vs<br>(Cyclophosphamide [500mg/m <sup>2</sup> d1,15]+Epirubicin [50mg/m <sup>2</sup> d1,15]+5-Fluorouracil [500mg/m <sup>2</sup> d1,15])q4wk ×6 postop              |
| <b>Reference</b>   | <i>Deo SVS, Bhutani, M, Shukla, NK, Raina V, Rath GK, Purkayasth J. Randomized trial comparing neo-adjuvant versus adjuvant chemotherapy in operable locally advanced breast cancer (T4b N0-2 M0). J Surg Oncol 2003; 84(4): 192-97.</i>                                                                                                                                                                                                                                    |
| <b>Trial</b>       | <b>Shanghai - China (pre-1990)</b>                                                                                                                                                                                                                                                                                                                                                                                                                                          |
| <b>Description</b> | 57 patients included; all received excisional biopsy followed by either radiotherapy or mastectomy.                                                                                                                                                                                                                                                                                                                                                                         |
| <b>Arms</b>        | (Cyclophosphamide [600mg/m <sup>2</sup> d1,8]+Methotrexate [30mg/m <sup>2</sup> d1,8]+5-Fluorouracil [500mg/m <sup>2</sup> d1,8]) ×2 pre-op<br>(Cyclophosphamide [600mg/m <sup>2</sup> d1,8]+Methotrexate [30mg/m <sup>2</sup> d1,8]+5-Fluorouracil [500mg/m <sup>2</sup> d1,8]) ×2 postop<br>vs<br>Placebo [d1,8] ×2 pre-op<br>(Cyclophosphamide [600mg/m <sup>2</sup> d1,8]+Methotrexate [30mg/m <sup>2</sup> d1,8]+5-Fluorouracil [500mg/m <sup>2</sup> d1,8]) ×6 postop |
| <b>Reference</b>   | <i>Shao ZM, Li J, Wu J, et al. Neo-adjuvant chemotherapy for operable breast cancer induces apoptosis. Breast Ca Res Treat 1999; 53(3): 263-69.</i>                                                                                                                                                                                                                                                                                                                         |
| <b>Trial</b>       | <b>Huguenin Chemotherapy - France (1989)</b>                                                                                                                                                                                                                                                                                                                                                                                                                                |
| <b>Description</b> | <40 patients included; trial abandoned early                                                                                                                                                                                                                                                                                                                                                                                                                                |
| <b>Arms</b>        | (5-Fluorouracil [500mg/m <sup>2</sup> ]+Doxorubicin [50mg/m <sup>2</sup> ]+Cyclophosphamide [500mg/m <sup>2</sup> ]) ×4 pre-op<br>(5-Fluorouracil [500mg/m <sup>2</sup> ]+Doxorubicin [50mg/m <sup>2</sup> ]+Cyclophosphamide [500mg/m <sup>2</sup> ]) ×2 postop<br>vs<br>(5-Fluorouracil [500mg/m <sup>2</sup> ]+Doxorubicin [50mg/m <sup>2</sup> ]+Cyclophosphamide [500mg/m <sup>2</sup> ]) ×6 postop                                                                    |
| <b>Reference</b>   | <i>Tubiana-Hulin M, Kerbrat P. Trial protocol: Chimiothérapie première des cancers du sein opérables. Unpublished, 1989.</i>                                                                                                                                                                                                                                                                                                                                                |
| <b>Trial</b>       | <b>Tokyo - Japan (1995-1997)</b>                                                                                                                                                                                                                                                                                                                                                                                                                                            |
| <b>Description</b> | 50 patients included; all had mastectomy, but some were excluded after randomization.                                                                                                                                                                                                                                                                                                                                                                                       |
| <b>Arms</b>        | (Epirubicin [50mg/m <sup>2</sup> ]+Cyclophosphamide [200mg/m <sup>2</sup> ])q3wk ×5 pre-op<br>vs<br>(Epirubicin [50mg/m <sup>2</sup> ]+Cyclophosphamide [200mg/m <sup>2</sup> ])q3wk ×5 postop                                                                                                                                                                                                                                                                              |
| <b>Reference</b>   | <i>Enomoto K, Ikeda T, Matsui A, et al. Neoadjuvant therapy in stage II with T&gt;=4CM and stage III breast cancer. 6th International Conference on adjuvant therapy for primary breast cancer, St Gallen 1998: Poster P73.</i>                                                                                                                                                                                                                                             |
| <b>Trial</b>       | <b>French Adjuvant Study Group - France (GFEA 04) (1990)</b>                                                                                                                                                                                                                                                                                                                                                                                                                |
| <b>Description</b> | Estimated 50 patients included in a 4-arm study, in which only the last 2 of the 4 arms would have been relevant.                                                                                                                                                                                                                                                                                                                                                           |
| <b>Arms</b>        | (Epirubicin+5-Fluorouracil+Cyclophosphamide) ×3 pre-op<br>(Epirubicin+5-Fluorouracil+Cyclophosphamide) ×3 postop<br>(Epirubicin+5-Fluorouracil+Cyclophosphamide) ×3 pre-op; (Epirubicin+5-Fluorouracil+Cyclophosphamide) ×3 postop<br>(Epirubicin+5-Fluorouracil+Cyclophosphamide) ×6 postop                                                                                                                                                                                |
| <b>Reference</b>   | <i>No reference available.</i>                                                                                                                                                                                                                                                                                                                                                                                                                                              |

**Webtable 9: Sensitivity analyses of using different methods to assess the effect of neo-adjuvant chemotherapy on local and distant recurrence**

*A. Effect of ignoring competing events (distant recurrence/non-breast death) on local recurrence rate ratio*

The local recurrence rate ratio from logrank methods was compared with that from Cox regression (using the same stratification as in the logrank method) and from a competing risks model using Cox regression. The local recurrence rate ratio varied little with the statistical method used.

| <b>Statistical method</b> | <b>Local recurrence rate ratio (95% CI)</b> |
|---------------------------|---------------------------------------------|
| Logrank                   | 1.37 (1.17-1.61)                            |
| Cox regression            | 1.37 (1.17-1.61)                            |
| Competing risks model     | 1.41 (1.20-1.64)                            |

**Reference:** Fine JP, Gray RJ. A proportional hazards model for the sub-distribution of a competing risk. *JASA* 1999; **94**: 496-509.

*B. Distant recurrence and recording of only the first event or of first and subsequent events*

Some trials collected only first events, but some recorded first and subsequent events. Analyses of distant recurrence in the two types of trial are compared. Rate ratios and failure rates varied little between them.

| <b>Events recorded</b>             | <b>Number of women</b> | <b>Rate ratio (95% CI) for distant recurrence</b> | <b>Percentage with distant recurrence (Neoadjuvant vs Adjuvant only)</b> |                                     |
|------------------------------------|------------------------|---------------------------------------------------|--------------------------------------------------------------------------|-------------------------------------|
|                                    |                        |                                                   | <b>10 years after randomisation</b>                                      | <b>15 years after randomisation</b> |
| First events and subsequent events | 2751                   | 1.04 (0.91-1.19)                                  | 36.2% vs 33.9%                                                           | 40.8% vs 39.5%                      |
| Only first events                  | 2005                   | 1.00 (0.85-1.17)                                  | 30.8% vs 30.5%                                                           | 35.3% vs 36.2%                      |
| <b>All trials</b>                  | <b>4756</b>            | <b>1.02 (0.92-1.14)</b>                           | <b>33.8% vs 32.4%</b>                                                    | <b>38.2% vs 38.0%</b>               |

**Webfigure 8: EBCTCG collaborators, alphabetically by institution or study then alphabetically by name**

*AARTM 048/13/2000 Multicentre Study Group, Spain*—J A Alberro, B Ballester, P Deulofeu, R Fábregas, M Fraile, J M Gubern, J Janer, A Moral, J L de Pablo, G Peñalva, P Puig, M Ramos, R Rojo, P Santesteban, C Serra, M Solà, L Solarnau, J Solsona, E Veloso, S Vidal.

*ACETBC, Tokyo, Japan*—O Abe, R Abe, K Enomoto, K Kikuchi, H Koyama, H Masuda, Y Nomura, Y Ohashi, K Sakai, K Sugimachi, M Toi, T Tominaga, J Uchino, M Yoshida.

*Addenbrooke's Hospital, Cambridge, UK*—C E Coles, J L Haybittle.

*AGO Breast Study Group (AGO-B), Germany*—V Möbus.

*Anglo-Celtic Cooperative Oncology Group, UK*—C F Leonard.

*ARCOSEIN Group, France*—G Calais, P Garaud.

*ATLAS Trial Collaborative Study Group, Oxford, UK*—V Collett, C Davies, A Delmestri, J Sayer.

*Auckland Breast Cancer Study Group, New Zealand*—V J Harvey, I M Holdaway, R G Kay, B H Mason.

*Australian New Zealand Breast Cancer Trials Group, Sydney, Australia*—J F Forbes, P A Francis, N Wilcken.

*Austrian Breast Cancer Study Group, Vienna, Austria*—M Balic, R Bartsch, C Fesl, F Fitzal, H Fohler, M Gnant, R Greil, R Jakesz, C Marth, B Mlineritsch, G Pfeiler, C F Singer, G G Steger, H Stöger.

*Beatson Oncology Centre, Glasgow, UK*—P Canney, H M A Yosef.

*Belgian Adjuvant Breast Cancer Project, Liège, Belgium*—C Focan.

*Berlin-Buch Akademie der Wissenschaften, Germany*—U Peek.

*Birmingham General Hospital, UK*—G D Oates, J Powell.

*Bordeaux Institut Bergonié, France*—M Durand, L Mauriac.

*Bordet Institute, Brussels, Belgium*—A Di Leo, S Dolci, D Larsimont, J M Nogaret, C Philippson, M J Piccart.

*Bradford Royal Infirmary, UK*—M B Masood, D Parker, J J Price.

*Breast Cancer International Research Group (BCIRG)*—M A Lindsay, J Mackey, M Martin.

*Breast Cancer Study Group of the Comprehensive Cancer Centre, Limburg, Netherlands*—P S G J Hupperets.

*British Association of Surgical Oncology BASO II Trialists, London, UK*—T Bates, R W Blamey, U Chetty, I O Ellis, E Mallon, D A L Morgan, J Patnick, S Pinder.

*British Columbia Cancer Agency, Vancouver, Canada*—C Lohrisch, A Nichol.

*Canadian Cancer Trials Group, Kingston, Ontario, Canada*—J M S Bartlett, V H Bramwell, B E Chen, S K L Chia, K Gelmon, P E Goss, M N Levine, W Parulekar, J L Pater, K I Pritchard, L E Shepherd, D Tu, T Whelan.

*Cancer and Leukemia Group B, Washington DC, USA*—D Berry, G Broadwater, C Cirrincione, H Muss, L Norton, R B Weiss.

*Cancer Care Ontario, Canada*—H T Abu-Zahra.

*Cancer Research Centre of the Russian Academy of Medical Sciences, Moscow, Russia*—A Karpov, S M Portnoj.

*Cancer Research UK Clinical Trials Unit (CRCTU), NCRI, Birmingham, UK*—S Bowden, C Brookes, J Dunn, I Fernando, M Lee, C Poole, D Rea, D Spooner.

*Cardiff Trialists Group, UK*—P J Barrett-Lee, R E Mansel, I J Monypenny.

*Case Western Reserve University, Cleveland, OH, USA*—N H Gordon.

*Central Oncology Group, Milwaukee, WI, USA*—H L Davis.

*Centre for Cancer Prevention, Wolfson Institute of Preventive Medicine, Queen Mary, University of London, UK*—J Cuzick, I Sestak.

*Centre Léon-Bérard, Lyon, France*—Y Lehingue, P Romestaing.

*Centre Paul Lamarque, Montpellier, France*—J B Dubois.

*Centre Régional François Baclesse, Caen, France*—T Delozier, B Griffon, J Mace Lesec'h.

*Centro Oncologico, Trieste, Italy*—G Mustacchi.

*Charles University in Prague, First Faculty of Medicine, Department of Oncology of the First Faculty of Medicine and General Teaching Hospital, Czech Republic*—L Petruzelka, O Pribylova.

*Cheltenham General Hospital, UK*—J R Owen.

*Chemo NO Trial Group, Germany*—N Harbeck, F Jänicke, C Meisner, M Schmitt, C Thomssen.

Chicago University, IL, USA—P Meier.

Chinese Academy of Medical Sciences, Beijing, People's Republic of China (in collaboration with the Oxford MRC PHRU)—Y Shan, Y F Shao, X Wang, D B Zhao (MRC PHRU: Z M Chen, H C Pan).

Christie Hospital and Holt Radium Institute, Manchester, UK—A Howell, R Swindell.

Coimbra Instituto de Oncologia, Portugal—J Albano, C F de Oliveira, H Gervásio, J Gordilho.

Copenhagen Breast Cancer Trials, Copenhagen, Denmark—B Ejlertsen, M-B Jensen, H Mouridsen.

Dana-Farber Cancer Institute, Boston, MA, USA—R S Gelman, J R Harris, D Hayes, C Henderson, C L Shapiro, E Winer.

Danish Breast Cancer Cooperative Group, Copenhagen, Denmark— P Christiansen, B Ejlertsen, M Ewertz, M-B Jensen, H T Mouridsen.

Düsseldorf University, Germany—T Fehm, H J Trampisch.

Dutch Working Party for Autologous Bone Marrow Transplant in Solid Tumours, Amsterdam & Groningen, Netherlands—O Dalesio, E G E de Vries, S Rodenhuis, H van Tinteren.

Eastern Cooperative Oncology Group, Boston, MA, USA—R L Comis, N E Davidson, R Gray, N Robert, G Sledge, L J Solin, J A Sparano, D C Tormey, W Wood.

Edinburgh Breast Unit, UK—D Cameron, U Chetty, J M Dixon, P Forrest, W Jack, I Kunkler.

Elim Hospital, Hamburg, Germany—J Rossbach.

Erasmus MC/Daniel den Hoed Cancer Center, Rotterdam, Netherlands— J G M Klijn, A D Treurniet-Donker, W L J van Putten.

European Institute of Oncology, Milan, Italy—N Rotmensz, U Veronesi, G Viale.

European Organization for Research and Treatment of Cancer, Brussels, Belgium—H Bartelink, N Bijker, J Bogaerts, F Cardoso, T Cufer, J P Julien, P M Poortmans, E Rutgers, C J H van de Velde.

Evanston Hospital, IL, USA—M P Cunningham.

Finnish Breast Cancer Group, Finland—R Huovinen, H Joensuu.

Fondazione Maugeri Pavia, Italy—A Costa.

Fondazione Michelangelo, Milan, Italy—G Bonadonna, L Gianni, P Valagussa.

Fox Chase Cancer Center, Philadelphia, PA, USA—L J Goldstein.

French Adjuvant Study Group (GFEA), Guyancourt, France—J Bonnetterre, P Fargeot, P Fumoleau, P Kerbrat, E Luporsi, M Namer.

GEICAM, Spanish Breast Cancer Group, Spain—E Carrasco, M Martin, M A Segui.

German Adjuvant Breast Group (GABG), Frankfurt, Germany—W Eiermann, J Hilfrich, W Jonat, M Kaufmann, R Kreienberg, M Schumacher.

German Breast Cancer Study Group (BMFT), Freiburg, Germany—G Bastert, H Rauschecker, R Sauer, W Sauerbrei, A Schauer, M Schumacher.

German Breast Group (GBG), Neu-Isenburg, Germany—J U Blohmer, S D Costa, H Eidtmann, B Gerber, C Jackisch, S Loibl, G von Minckwitz.

Ghent University Hospital, Belgium—A de Schryver, L Vakaet.

GIVIO Interdisciplinary Group for Cancer Care Evaluation, Chieti, Italy—M Belfiglio, A Nicolucci, F Pellegrini, M C Pirozzoli, M Sacco, M Valentini.

Glasgow Victoria Infirmary, UK—C S McArdle, D C Smith, S Stallard.

Groote Schuur Hospital, Cape Town, South Africa—D M Dent, C A Gudgeon, A Hacking, E Murray, E Panieri, ID Werner.

Gruppo Interdisciplinare Veneto di Oncologia Mammaria (GIVOM), Italy—G L De Salvo, P Del Bianco, G Zavagno.

Grupo Oncológico Cooperativo del Sur (GOCS), Argentina—B Leone, C T Vallejo, A Zwenger.

Gruppo Oncologico Clinico Cooperativo del Nord Est, Aviano, Italy—E Galligioni.

Gruppo Oncologico Dell'Italia Meridionale (GOIM), Rome, Italy—M Lopez.

Guadalajara Hospital de 20 Noviembre, Mexico—A Erazo, J Y Medina.

Gunma University, Japan—J Horiguchi, H Takei.

Guy's Hospital, London, UK—I S Fentiman, J L Hayward, R D Rubens, D Skilton.

*Heidelberg University I, Germany*—H Scheurlen.  
*Heidelberg University II, Germany*—M Kaufmann, H C Sohn.  
*Helios Klinikum Berlin-Buch, Germany*—M Untch.  
*Hellenic Breast Surgeons Society, Greece*—U Dafni, C Markopoulos.  
*Hellenic Cooperative Oncology Group, Athens, Greece*—C Bamia, G Fountzilas, G-A Koliou, K Manousou.  
*Hellenic Oncology Research Group, Greece*—D Mavroudis.  
*Helsinki Deaconess Medical Centre, Finland*—P Klefstrom.  
*Helsinki University, Finland*—C Blomqvist, T Saarto.  
*Hospital del Mar, Barcelona, Spain*—M Gallen.  
*Humanitas Cancer Center, Milan, Italy*—G. Canavese, C Tinterri.  
*Innsbruck University, Austria*—R Margreiter.  
*Institut Claudius Regaud, Toulouse, France*—B de Lafontan, J Mihura, H Roché.  
*Institut Curie, Paris, France*—B Asselain, R J Salmon, J R Vilcoq.  
*Institut Curie - Hôpital René Huguenin, Paris, St Cloud, France*—E Brain, B de La Lande, E Mouret-Fourme.  
*Institut Gustave-Roussy, Paris, France*—F André, R Arriagada, S Delalogue, C Hill, S Koscielny, S Michiels, C Rubino.  
*Institute of Cancer Research Clinical Trials and Statistics Unit (ICR-CTSUs, NCRI), UK*—R A'Hern, J Bliss, P Ellis, L Kilburn, J R Yarnold.  
*Instituto de Investigación Sanitaria Gregorio Marañón, Universidad Complutense, GEICAM, CIBERONC, Madrid, Spain*—M Martin.  
*Integraal Kankercentrum, Amsterdam, Netherlands*—J Benraadt, M Kooi, A O van de Velde, J A van Dongen, J B Vermorcken.  
*International Breast Cancer Study Group (IBCSG), Bern, Switzerland*—M Castiglione, A Coates, M Colleoni, J Collins, J Forbes, R D Gelber, A Goldhirsch, J Lindtner, K N Price, M M Regan, C M Rudenstam, H J Senn, B Thuerlimann.  
*International Collaborative Cancer Group, Charing Cross Hospital, London, UK*—J M Bliss, C E D Chilvers, R C Coombes, E Hall, M Marty.  
*International Drug Development Institute, Louvain-la-Neuve, Belgium*—M Buyse.  
*International TABLE Study Group, Berlin, Germany*—K Possinger, P Schmid, M Untch, D Wallwiener.  
*ISD Cancer Clinical Trials Team (incorporating the former Scottish Cancer Therapy Network), Edinburgh, UK*—L Foster, W D George, H J Stewart, P Stroner.  
*Israel NSABC, Tel Aviv, Israel*—R Borovik, H Hayat, M J Inbar, T Peretz, E Robinson.  
*Istituto Nazionale per lo Studio e la Cura dei Tumori, Milan, Italy*—T Camerini, F Formelli, G Martelli, M G Di Mauro, P Valagussa.  
*Istituto Nazionale Tumori IRCCS Fondazione Pascale, Napoli, Italy*—F Perrone.  
*Istituto Scientifico Romagnolo per lo Studio e la Cura dei Tumori, Meldola, Italy*—D Amadori.  
*Italian Cooperative Chemo-Radio-Surgical Group, Bologna, Italy*—A Martoni, F Pannuti.  
*Italian Oncology Group for Clinical Research (GOIRC), Parma, Italy*—R Camisa, A Musolino, R Passalacqua.  
*Japan Clinical Oncology Group—Breast Cancer Study Group, Japan*—H Iwata, T Shien.  
*Japanese Foundation for Multidisciplinary Treatment of Cancer, Tokyo, Japan*—O Abe, T Ikeda, K Inokuchi, K Kikuchi, K Sawa.  
*Kawasaki Medical School, Japan*—H Sonoo.  
*Klinikum Bayreuth, Germany*—M Sadoon, A H Tulusan.  
*Kobe Breast Cancer Oncology Group, Japan*—N Kohno, M Miyashita, S Takao.  
*Korean Cancer Study Group (KCSG), Seoul, South Korea*—J.-H Ahn, K H Jung.  
*Krakow Institute of Oncology, Poland*—S Korzeniowski, J Skolyszewski.  
*Kumamoto University Group, Japan*—M Ogawa, J Yamashita.  
*Leiden University Medical Center, Netherlands*—E Bastiaannet, G J Liefers, C J H van de Velde.  
*Leuven Akademisch Ziekenhuis, Gasthuisberg, Belgium*—R Christiaens, P Neven, R Paridaens, W Van den Bogaert.

*Ludwig-Maximilians University, Munich, Germany*—S Braun.

*Marseille Laboratoire de Cancérologie Biologique APM, France*—P Martin, S Romain.

*Medical University Vienna – General Hospital - Department of Obstetrics and Gynaecology and Department of Medicine I, Vienna, Austria*—M Janauer, M Seifert, P Sevelda, C C Zielinski.

*Memorial Sloan-Kettering Cancer Center, New York, NY, USA*—T Hakes, C A Hudis, L Norton, R Wittes.

*Metaxas Memorial Cancer Hospital, Athens, Greece*—G Giokas, D Kondylis, B Lissaios.

*Mexican National Medical Center, Mexico City, Mexico*—R de la Huerta, M G Sainz.

*MRC Population Health Research Unit (MRC PHRU), Nuffield Department of Population Health (NDPH), Oxford, UK (ie, members of the MRC PHRU-based EBCTCG Secretariat)*—C Boddington, R Bradley, J Braybrooke, J A Burrett, M Clarke, D Cutter, C Davies, D Dodwell, F Duane, V Evans, L Gettins, J Godwin, R Gray, S James, A Kerr, H Liu, E MacKinnon, G Mannu, P McGale, T McHugh, P Morris, H C Pan, R Peto, S Read, C Taylor, Y Wang, Z Wang.

*National Cancer Center, Goyang, South Korea*—J Ro.

*National Cancer Institute, Bethesda, MD, USA*—K Camphausen, D Danforth, A Lichter, M Lippman, D Smart, S Steinberg.

*National Cancer Institute of Bari, Italy*—C D’Amico, M Lioce, A Paradiso.

*National Kyushu Cancer Center, Japan*—Y Nomura, S Ohno.

*National Surgical Adjuvant Breast and Bowel Project (NSABP), Pittsburgh, PA, USA*—S Anderson, G Bass, A Brown (deceased), J Bryant (deceased), J Costantino, J Dignam, B Fisher, C Geyer, E P Mamounas, S Paik, C Redmond, S Swain, L Wickerham, N Wolmark.

*National Surgical Adjuvant Study Group (N-SAS-BC), Japan*—T Aihara, Y Hozumi, Y Nomura.

*Nolvadex Adjuvant Trial Organisation, London, UK*—M Baum, I M Jackson (deceased), M K Palmer.

*North Central Cancer Treatment Group, Mayo Clinic, Rochester, MN, USA*—E Perez, J N Ingle, V J Suman.

*North Sweden Breast Cancer Group, Umeå, Sweden*—A Andresson, N O Bengtsson, H Jonsson, M Sund.

*North-West Oncology Group (GONO), Italy*—L Del Mastro, M Venturini.

*North-Western British Surgeons, Manchester, UK*—J P Lythgoe, R Swindell.

*Northwick Park Hospital, London, UK*—M Kissin.

*Norwegian Breast Cancer Group, Oslo, Norway*—B Erikstein, E Hannisdal, A B Jacobsen, K V Reinertsen, J E Varhaug.

*Norwegian Radium Hospital, Oslo, Norway*—B Erikstein, S Gundersen, M Hauer-Jensen, H Høst, A B Jacobsen, R Nissen-Meyer.

*Nottingham City Hospital, UK*—R W Blamey, A K Mitchell, D A L Morgan, J F R Robertson.

*Oita Prefectural Hospital, Japan*—H Ueo.

*Oncofrance, Paris, France*—M Di Palma, G Mathé (deceased), J L Misset.

*Ontario Clinical Oncology Group, Hamilton, Canada*—M Levine, K I Pritchard, T Whelan.

*Osaka City University, Japan*—K Morimoto.

*Osaka National Hospital, Japan*—K Sawa, Y Takatsuka.

*Ospedale Policlinico San Martino, Genova, Italy*—D Bedognetti, C Bighin, P Bruzzi, L Del Mastro, B Dozin, S Pastorino, P Pronzato, M R Sertoli.

*Oxford University Hospitals NHS Foundation Trust, Churchill Hospital, Oxford, UK*—E Crossley, A Harris, D Talbot, M Taylor.

*Parma Hospital, Italy*—G Cocconi, B di Blasio.

*Petrov Research Institute of Oncology, St Petersburg, Russia*—V Ivanov, R Paltuev, V Semiglazov.

*Piedmont Oncology Association, Winston-Salem, NC, USA*—J Brockschmidt, M R Cooper.

*Pretoria University, South Africa*—C I Falkson.

*ProBONE study group, Marburg, Germany*—P Hadji.

*Royal Marsden NHS Trust, London and Sutton, UK*—R A’Hern, M Dowsett, A Makris, M Parton, K Pennert, T J Powles, I E Smith, J R Yarnold.

*SABRE trial group (international)*—G Clack, C Van Poznak.

*St George Hospital, Sydney, Australia*—L Browne, P Graham.

*St George's Hospital, London, UK*—J C Gazet.

*St Luke's Hospital, Dublin, Ireland*—N Corcoran.

*Sardinia Oncology Hospital A Businico, Cagliari, Sardinia*—N Deshpande, L di Martino.

*SASIB International Trialists, Cape Town, South Africa*—P Douglas, A Hacking, H Høst, A Lindtner, G Notter.

*Saskatchewan Cancer Foundation, Regina, Canada*—A J S Bryant, G H Ewing, L A Firth, J L Krushen-Kosloski.

*Scandinavian Adjuvant Chemotherapy Study Group, Oslo, Norway*—R Nissen-Meyer.

*South Sweden Breast Cancer Group, Lund, Sweden*—H Anderson, F Killander, P Malmström, L Rydén.

*South-East Sweden Breast Cancer Group, Linköping, Sweden*—L-G Arnesson, J Carstensen, M Dufmats, H Fohlin, B Nordenskjöld, M Söderberg, M Sundqvist.

*South-Eastern Cancer Study Group and Alabama Breast Cancer Project, Birmingham, AL, USA*—J T Carpenter.

*Southampton Oncology Centre, UK*—N Murray, G T Royle, P D Simmonds.

*Southwest Oncology Group, San Antonio, TX, USA*—K Albain, W Barlow, J Crowley, D Hayes, J Gralow, G Hortobagyi, R Livingston, S Martino, C K Osborne, P M Ravdin.

*Stockholm Breast Cancer Study Group, Sweden*—J Bergh, T Bondesson, F Celebioglu, K Dahlberg, T Fornander, I Fredriksson, J Frisell, E Göransson, M Iiristo, U Johansson, E Lenner, L Löfgren, P Nikolaidis, L Perbeck, S Rotstein, K Sandelin, L Skoog, G Svane, E af Trampe, C Wadström.

*SUCCESS-Study Group, University of Düsseldorf, Germany*—W Janni.

*Swiss Group for Clinical Cancer Research (SAKK), Bern, and OSAKO, St Gallen, Switzerland*—M Castiglione, A Goldhirsch, R Maibach, H J Senn, B Thürlimann.

*Tamoxifen Exemestrane Adjuvant Multinational (TEAM) trial*—J M S Bartlett, E Bastiaannet, P Hadji, Y Hozumi, D Rea, C J H van de Velde.

*Tampere University Hospital, Finland*—K Holli, K Rouhento.

*Tel Aviv Sourasky Medical Center, Sackler School of Medicine, Tel Aviv University, Israel*—T Safra.

*Tel Aviv University, Israel*—H Brenner, A Hercbergs.

*Tokyo Cancer Institute Hospital, Japan*—M Yoshimoto.

*Toronto-Edmonton Breast Cancer Study Group, Canada*—A H G Paterson, K I Pritchard.

*Toronto Princess Margaret Hospital, Canada*—A Fyles, J W Meakin, T Panzarella, K I Pritchard.

*Tunis Institut Salah Azaiz, Tunisia*—J Bahi.

*UCBG, French Breast Cancer Intergroup UNICANCER, France*—S Delaloge, J Lemonnier, A L Martin.

*UK Multicentre Cancer Chemotherapy Study Group, London, UK*—M Reid, M Spittle.

*UK/ANZ DCIS Trial*—H Bishop, N J Bundred, J Cuzick, I O Ellis, I S Fentiman, J F Forbes, S Forsyth, W D George, S E Pinder, I Sestak.

*UK/Asia Collaborative Breast Cancer Group, London, UK*—G P Deutsch, R Gray, D L W Kwong, V R Pai, R Peto, F Senanayake.

*University and Istituto Nazionale per la Ricerca sul Cancro, Genoa, Italy on behalf of GROCTA trialists*—F Boccardo, A Rubagotti.

*University College London, UK*—M Baum, S Forsyth, A Hackshaw, J Houghton, J Ledermann, K Monson, JS Tobias.

*University Federico II, Naples, Italy*—C Carlomagno, M De Laurentiis, S De Placido.

*University Medical Center Schleswig-Holstein, Campus Kiel, Germany*—C Schem.

*University of Edinburgh, UK*—L Williams.

*University of Leeds, UK*—R Bell, D Cameron, R E Coleman, D Dodwell, S Hinsley, H C Marshall.

*University of Michigan, USA*—D Hayes, L J Pierce.

*University of Padua, Padova, Italy*—S M M Basso, F Lumachi.

*University of Saarland, Germany*—E Solomayer.

*University of Sheffield, UK*—R E Coleman, J M Horsman, J Lester, M C Winter.

*University of Texas MD Anderson Cancer Center, Houston, TX, USA*—A U Buzdar, L Hsu.

*University of Wisconsin, USA*—R R Love.



*Uppsala-Örebro Breast Cancer Study Group, Sweden*—J Ahlgren, H Garmo, L Holmberg, G Liljegren, H Lindman, F Wärnberg.

*U.S. Oncology, Houston, USA*—L Asmar, S E Jones.

*Washington University, St Louis, Missouri, USA*—R Aft.

*West German Study Group (WSG), Germany*—O Gluz, N Harbeck, C Liedtke, U Nitz.

*West of Scotland Breast Trial Group, Glasgow, UK*—A Litton.

*West Sweden Breast Cancer Study Group, Gothenburg, Sweden*—A Wallgren, P Karlsson, B K Linderholm.

*Western Cancer Study Group, Torrance, CA, USA*—R T Chlebowski.

*Würzburg University, Germany*—H Caffier.

*Z-FAST, ZO-FAST & E-ZO-FAST study groups (international)*—A M Brufsky, R E Coleman, H A Llombart, on behalf of Novartis Pharmaceuticals.

01 December 2017
